## 1 **Main Manuscript for**

### 2 **A redox switch allows binding of ferrous and ferric ions in the** 3 **cyanobacterial iron binding protein FutA from *Prochlorococcus***

4 **Rachel Bolton<sup>a,b</sup>, Moritz M. Machelett<sup>a,c</sup>, Jack Stubbs<sup>a,b</sup>, Danny Axford<sup>b</sup>, Nicolas**  
5 **Caramello<sup>d,e</sup>, Lucrezia Catapano<sup>f,g</sup>, Martin Malý<sup>a</sup>, Matthew J. Rodrigues<sup>a,b,h</sup>, Charlotte**  
6 **Cordery<sup>a,b</sup>, Graham J. Tizzard<sup>i</sup>, Fraser MacMillan<sup>j</sup>, Sylvain Engilberge<sup>d</sup>, David von Stetten<sup>k</sup>,**  
7 **Takehiko Toshi<sup>l</sup>, Hiroshi Sugimoto<sup>l</sup>, Jonathan A.R. Worrall<sup>m</sup>, Jeremy S. Webb<sup>a,b</sup>, Mike**  
8 **Zubkov<sup>c,n</sup>, Simon Coles<sup>i</sup>, Eric Mathieu<sup>o</sup>, Roberto A. Steiner<sup>f,p</sup>, Garib Murshudov<sup>g</sup>, Tobias E.**  
9 **Schrader<sup>q</sup>, Allen M. Orville<sup>b,r</sup>, Antoine Royant<sup>d,o</sup>, Gwyndaf Evans<sup>b,s</sup>, Michael A. Hough<sup>b,m,r</sup>,**  
10 **Robin L. Owen<sup>b</sup>, Ivo Tews<sup>a</sup>**

11 <sup>a</sup> Biological Sciences, Institute for Life Sciences, University of Southampton, Southampton, SO17  
12 1BJ, UK

13 <sup>b</sup> Diamond Light Source, Harwell Science and Innovation Campus, Didcot, Oxfordshire, OX11  
14 0DE, UK

15 <sup>c</sup> National Oceanography Centre, Southampton SO14 3ZH, UK

16 <sup>d</sup> European Synchrotron Radiation Facility, 38043 Grenoble Cedex 9, France

17 <sup>e</sup> Hamburg Centre for Ultrafast Imaging, HARBOR, Universität Hamburg, Luruper Chaussee 149,  
18 22761 Hamburg, Germany

19 <sup>f</sup> Randall Centre of Cell and Molecular Biophysics, King's College London, New Hunt's House,  
20 Guy's Campus, London, SE1 1UL, UK

21 <sup>g</sup> MRC Laboratory of Molecular Biology, Francis Crick Avenue, Cambridge Biomedical Campus,  
22 Cambridge, CB2 0QH, UK

23 <sup>h</sup> Laboratory of Biomolecular Research, Paul Scherrer Institute, 5232 Villigen, Switzerland

24 <sup>i</sup> School of Chemistry, University of Southampton, Southampton, SO17 1BJ, UK

25 <sup>j</sup> School of Chemistry, University of East Anglia, Norwich NR4 7TJ, UK

26 <sup>k</sup> European Molecular Biology Laboratory (EMBL), Hamburg Unit, Notkestraße 85, 22607  
27 Hamburg, Germany

28 <sup>l</sup> Synchrotron Radiation Life Science Instrumentation Team, RIKEN SPring-8 Center, 1-1-1 Kouto,  
29 Sayo, Hyogo 679-5148, Japan

30 <sup>m</sup> School of Life Sciences, University of Essex, Wivenhoe Park, Colchester CO4 3SQ, UK

31 <sup>n</sup> Scottish Association for Marine Science, Oban PA37 1QA, Scotland, UK

32 <sup>o</sup> Univ. Grenoble Alpes, CNRS, CEA, Institut de Biologie Structurale (IBS), 38044 Grenoble  
33 Cedex 9, France

34 <sup>p</sup> Department of Biomedical Sciences, University of Padova, Viale G. Colombo 3, 35131 Padova,  
35 Italy

36 <sup>q</sup> Forschungszentrum Jülich GmbH, Jülich Centre for Neutron Science (JCNS), Lichtenbergstraße  
37 1, 85748 Garching, Germany

38 <sup>r</sup> Research Complex at Harwell, Harwell Science and Innovation Campus, Didcot, OX11 0FA,  
39 United Kingdom

40 <sup>s</sup> Rosalind Franklin Institute, Harwell Science and Innovation Campus, Didcot, Oxfordshire, OX11  
41 0FA, UK

42 \*Corresponding author: Ivo Tews, Biological Sciences, Institute for Life Sciences, University of  
43 Southampton, Southampton, SO17 1BJ, UK, m: [ivo.tews@soton.ac.uk](mailto:ivo.tews@soton.ac.uk)

44 **Email:** [ivo.tews@soton.ac.uk](mailto:ivo.tews@soton.ac.uk)

45 **Author Contributions:** Investigation: RB, MMM, JS, DA, NC, CC, GJT, FMM, SE, EM, TS, AR,  
46 MH, RLO, IT; Formal Analysis: RB, JS, DA, NC, LC, MM, MJR, FMM, TS, AR, IT; Methodology:  
47 DA, NC, LC, MJR, SE, DvS, TT, HS, JW, RAS, GM, TS, AR, MH, RLO, IT; Funding acquisition:  
48 JSW, MZ, SC, AMO, GE, MH, IT; Writing – original draft: RB, MoM, IT, Writing – review & editing:  
49 RB, DA, AMO, AR, MH, RLO, IT.

50 **Competing Interest Statement:** The authors do not declare competing interests.

51 **Classification:** Biological Sciences / Biophysics and Computational Biology.

52 **Keywords:** cyanobacteria, serial femtosecond crystallography, radiation damage, iron, ABC  
53 transporter.

54 **This PDF file includes:**

55 Main Text  
56 Figures 1 to 4

## 57 **Abstract**

58 The marine cyanobacterium *Prochlorococcus* is a main contributor to global photosynthesis,  
59 whilst being limited by iron availability. Cyanobacterial genomes typically encode two different  
60 types of FutA iron binding proteins: periplasmic FutA2 ABC transporter subunits bind ferric ( $\text{Fe}^{3+}$ ),  
61 while cytosolic FutA1 binds ferrous ( $\text{Fe}^{2+}$ ). Owing to their small size and their economized  
62 genome *Prochlorococcus* ecotypes typically possess a single *futA* gene. How the encoded FutA  
63 protein might bind different Fe oxidation states was previously unknown. Here we use structural  
64 biology techniques at room temperature to probe the dynamic behavior of FutA. Neutron  
65 diffraction confirmed four negatively charged tyrosinates, that together with a solvent molecule  
66 coordinate iron in trigonal bipyramidal geometry. Positioning of the positively charged Arg103 side  
67 chain in the second coordination shell was consistent with an overall charge-neutral ferric binding  
68 state in structures determined by neutron diffraction and serial femtosecond crystallography.  
69 Conventional rotation X-ray crystallography using a home source revealed X-ray induced  
70 photoreduction of the iron center with observation of the ferrous binding state; here, an additional  
71 positioning of the Arg203 side chain in the second coordination shell maintained an overall  
72 charge neutral ferrous binding site. Room temperature dose series using serial synchrotron  
73 crystallography and an XFEL X-ray pump-probe approach capture the transition between ferric  
74 and ferrous states, revealing how Arg203 operates as a switch to accommodate the different iron  
75 oxidation states. This switching ability of the *Prochlorococcus* FutA protein may reflect ecological  
76 adaptation by genome streamlining and loss of specialized FutA proteins.

## 77 **Significance Statement**

78 Oceanic primary production by marine cyanobacteria is a main contributor to carbon and nitrogen  
79 fixation. *Prochlorococcus* is the most abundant photosynthetic organism on Earth, with an annual  
80 carbon fixation comparable to the net global primary production from agriculture. Its remarkable  
81 ecological success is based on the ability to thrive in low nutrient waters. To manage iron  
82 limitation, *Prochlorococcus* possesses the FutA protein for iron uptake and homeostasis. We  
83 reveal a switch in the FutA protein that allows it to accommodate binding of iron in either the ferric  
84 ( $\text{Fe}^{3+}$ ) or ferrous ( $\text{Fe}^{2+}$ ) state using structural biology techniques at room temperature and provide  
85 a plausible mechanism for FutA as a bifunctional redox state sensing protein.

## 86 **Main Text**

### 87 **Introduction**

88 Iron is the fourth most abundant element in the Earth's crust (1). However, because of its poor  
89 solubility, primary production in large oceanic and freshwater environments is limited by iron  
90 uptake (2). In oxygenated aqueous environments, iron predominantly exists in the ferric ( $\text{Fe}^{3+}$ )  
91 state with a solubility of  $10^{-18}$  M (3). Ferric iron precipitates to form ferric oxyhydroxides (4)  
92 thought not to be generally bioavailable (5). Marine phytoplankton require iron in the  
93 photosynthetic electron transport chain (6) and in the nitrogenase enzyme (7, 8); thus, iron  
94 availability directly limits photosynthesis (9) and nitrogen fixation (10).

95 Cyanobacteria of the *Prochlorococcus* genus are able to fix four gigatons of carbon per annum,  
96 which is comparable to the net primary production of global agriculture (11). *Prochlorococcus*  
97 bacteria dominate bacterial populations in tropical and subtropical oligotrophic ocean regions  
98 (12). One of the factors for ecological success is the exceptional ability of this bacterium to thrive  
99 in low nutrient waters (13). Adaptation includes reduction in size to  $0.5 - 0.7 \mu\text{m}$ , making  
100 *Prochlorococcus* not only the most abundant but also the smallest photosynthetic organism on  
101 Earth (14). Reduction in size maximizes the area-to-volume ratio for metabolic efficiency, to a  
102 tradeoff of genome reduction, and *Prochlorococcus* maintains the smallest genome (1.6-2.7 Mb)  
103 known for any free-living phototroph (15).

104 Typically, cyanobacteria harbor multiple iron uptake systems (16). Common is the use of organic  
105 ligands used to solubilize iron (siderophores) using the TonB transport system (17). The majority  
106 of the *Prochlorococcus* species lack genes for siderophore biosynthesis (18, 19); instead, the  
107 bacterium primarily relies on the Fut ABC transporter system for iron uptake (20). Here,  
108 specialized periplasmic iron binding proteins sequester elemental iron and deliver it to ABC  
109 transporters for uptake (16) that uses the FutA2 substrate binding protein (SBP) as a periplasmic  
110 ferric iron binding protein (21, 22). Functional assignment of the FutA1 homologue is binding of  
111 ferrous iron within the cytoplasm to protect the photosystem against oxidative stress (23-25);  
112 however, FutA1 has also been shown to bind ferric iron (21, 26). We have previously shown that  
113 the single FutA protein of the marine cyanobacterium *Trichodesmium* may indeed have dual  
114 localization and function (27), suggesting a single FutA protein can bind both ferric and ferrous  
115 iron species. Similarly, *Prochlorococcus* harbors a single *futA* gene (20). We wanted to  
116 understand whether a single FutA protein can bind both iron species, and how redox plasticity  
117 was structurally encoded.

118 It is challenging to obtain crystallographic models without alteration of the metal sites, since site-  
119 specific damage occurs extremely quickly and at very low doses (28), particularly for iron (29, 30).  
120 Indeed, the FutA structure determined from a conventional diffraction experiment on an X-ray  
121 home source reported here represented the photo-reduced, ferrous binding state, corroborated  
122 by spectroscopic evidence. A serial femtosecond crystallography approach (SFX) using an XFEL  
123 source and a complementary neutron diffraction approach were required to avoid the  
124 manifestations of X-ray induced photoreduction in order to determine the ferric state and give  
125 protonation states of iron coordinating amino acid side chains. Using a fixed-target silicon chip  
126 system for crystal delivery (31) at both synchrotron and XFEL radiation sources, we studied the  
127 transition between ferric to ferrous states at room temperature whilst making use of the effects of  
128 X-ray induced photoreduction, varying dose and time. The resulting protein structures support a  
129 dual binding mode for iron and give insight into protein adaptation to evolutionary pressures.

## 130 Results

131 **The structure of FutA at room temperature (RT).** The crystallographic X-ray structure of FutA  
132 was determined from a single crystal to 1.7 Å resolution, using a standard rotation protocol with  
133 the crystal in a sealed capillary at a home source setup (**Table S1**). Substrate binding domains  
134 such as FutA can be classified based on overall fold (32), and *Prochlorococcus* FutA classifies as  
135 “D type” substrate binding protein. The N-terminal (amino acids 1-98 and 232-280, light grey) and  
136 C-terminal domains (amino acids 99-231 and 281-314, dark grey) are highlighted in **Fig. 1A**.

137 The substrate-binding cleft bears the iron-binding site that is open to the surrounding solvent. The  
138 four tyrosine side chains of Tyr13 from N-terminal and Tyr143, Tyr199 and Tyr200 from C-  
139 terminal domains coordinate the iron, **Fig. 1B**, in this Class IV substrate binding protein (33). The  
140 trigonal bipyramidal coordination involves Tyr13, Tyr143 and Tyr200 to form the trigonal plane  
141 with iron at its center, while Tyr199 and a coordinating solvent molecule are the axial ligands.

142 Interestingly, the structure reveals a positioning of two arginine side chains, Arg103 and Arg203,  
143 in a second shell around the iron binding site, **Fig. 1C**. One might assume the tyrosine side  
144 chains are negatively charged tyrosinates, and arginine side chains would each provide a positive  
145 charge, the solvent molecule being either water or a hydroxyl ion. To understand the state of the  
146 bound iron, we used spectroscopy and went on to confirm the protonation state of surrounding  
147 amino acids side chains using a neutron diffraction experiment.

148 **Determination of the ferric iron binding state by Electron Paramagnetic Resonance (EPR)**  
149 **spectroscopy.** A refolding protocol in presence of iron sulfate was used to purify FutA. The  
150 burgundy red color of the purified protein that can readily be bleached by excess sodium  
151 dithionite likely resulted from the ligand to metal charge transfer (LMCT) bands between the  
152 tyrosinate residues coordinating the Fe<sup>3+</sup> ion, **Fig. 2A**. The EPR spectrum taken in solution shows

153 a sharp signal at a g-value of 4.29, **Fig. 2B**. This signal is indicative of a  $|\pm 3/2\rangle$  doublet from a  $3d^5$ ,  
154 high-spin ( $S = 5/2$ ) isotropic system ( $E/D \approx 1/3$ ), consistent with an  $\text{Fe}^{3+}$  ion bound to FutA (34).  
155 The weaker signals ( $g = 5.67$ ,  $g = 7.90$ ) derive from either  $|\pm 1/2\rangle$  ground state transitions or from  
156  $|\pm 3/2\rangle$  resonances from rhombic species of the ferric iron. However, given the very high transition  
157 probabilities for the  $g = 4.29$  signal compared to the lower transition probability for ground state or  
158 anisotropic species, the latter resonances likely represent a significant fraction of the total spins in  
159 the sample. Excess of sodium dithionite leads to the loss of the EPR signal, **Fig. 2B**. This could  
160 result from loss of iron binding and reduction in solution, or reduction of ferric iron to a colorless  
161 and  $3d^6$  EPR-silent (probably  $S=2$ ) ferrous state within the active site.

162 **Protonation state of iron coordinating residues as determined by neutron diffraction.** To  
163 confirm the presence of tyrosinates in FutA we determined the crystallographic structure of FutA  
164 by neutron diffraction to 2.1 Å resolution at RT (**Tables S1 & S2**). The neutron diffraction  
165 structure shows that the side chain of Arg203 is not engaged in any interactions and does not  
166 contribute to the second shell (**Fig. S1**), in contrast to the RT X-ray structure, **Fig. 1**. Positive  
167 density in the neutron  $F_o - F_c$  omit map indicates sites of successful hydrogen-deuterium exchange,  
168 revealing the fully protonated and thus positively charged side chain of Arg103, **Fig. 2C**. The lack  
169 of deuterium on the iron coordinating Tyr13, Tyr143, Tyr199 and Tyr200 suggests these residues  
170 are tyrosinates. Thus, the iron binding site is made up from four negatively charged tyrosinates  
171 and a positively charged arginine in the second shell. Assuming the solvent molecule is neutral  
172 water, iron bound in the ferric  $\text{Fe}^{3+}$  state would give charge balance.

173 **The ferric iron state structure determined by serial femtosecond crystallography (SFX).**  
174 The SFX experiment used short (10 fs), high-intensity X-ray pulses from the SACLA XFEL to  
175 provide diffraction patterns that are collected before the crystal is destroyed (35). It has been  
176 shown that data can be recorded free of the effects of radiation induced changes as long as  
177 sufficiently short pulses (<20 fs) are used (36). Crystallization conditions were optimized to obtain  
178 microcrystal slurries suitable for SFX, as described by us previously (37). For data collection,  
179 crystals of approximately  $20 \times 7 \times 7 \mu\text{m}^3$  were applied onto a fixed-target silicon chip, with the  
180 final dataset merged from three chips (**Table S1**).

181 SFX and neutron diffraction structures are similar (see comparison in SI), with the Arg103 side  
182 chain contributing to the second shell, but the side chain of Arg203 pointing away from the  
183 binding site, **Fig. 2D**. EPR data, neutron diffraction and SFX agree and are consistent with iron  
184 binding in the ferric state. In turn, this suggests that the structure determined from the RT X-ray  
185 home source with the Arg203 side chain pointing towards the binding site as shown in **Fig. 1** may  
186 represent the ferrous state.

187 **Characterization of X-ray induced photoreduction of ferric FutA.** The home source rotation  
188 experiment might either fortuitously have captured the reduced state, or this observation had  
189 resulted from X-ray induced photoreduction of  $\text{Fe}^{3+}$  to  $\text{Fe}^{2+}$ . Photoreduction was highly likely,  
190 considering the bleaching of the burgundy-red appearance in the X-ray exposed area of the  
191 crystal during data collection. We thus went on to characterize the effect of X-ray exposure using  
192 *in crystallo* optical spectroscopy (38).

193 The electronic absorption peak ( $\lambda_{\text{max}} = 438 \text{ nm}$ ) corresponding to the ferric iron (39) progressively  
194 decays on incident X-ray irradiation at a synchrotron beamline, **Fig. 3A**. As X-rays induce light-  
195 absorbing chemical species in the solvent that overlap with the ferric iron specific signal, the 620  
196 nm wavelength was chosen to minimize the effect of this artefact and characterize photoreduction  
197 of the iron center, plotting absorbance against accumulated radiation dose, **Fig. 3B**. Measuring  
198 five different crystals, we determined a half-photoreduction dose of  $56 \pm 10 \text{ kGy}$ ; the dose at  
199 which 80% of the molecules had been photoreduced was  $90 \pm 13 \text{ kGy}$ .

200 **Tracking of X-ray induced photoreduction from a dose series.** A fixed target dose slicing  
201 approach with ten dose points at 10 ms exposure each was used to follow structural changes of

202 the FutA / iron complex in response to X-ray induced photoreduction (**Tables S3 & S4**). As  
203 described by us previously (31), serial synchrotron crystallography (SSX) was used as it is well  
204 suited for low dose investigations at ambient temperatures, with the dose being spread across  
205 thousands of crystals. The isomorphous difference density indicates an alternative conformation  
206 for Arg203. The feature is readily visible at 22 kGy and strongest at 88 kGy, **Fig. 3C**. Indeed,  
207 overlay with the conformation observed in the home source structure, **Fig. 1C**, shows that both  
208 structures are similar, suggesting the photoreduced state was observed in both cases.

209 **An XFEL X-ray pump-probe (XRPP) approach capturing the transition between ferric and**  
210 **ferrous states.** We designed a novel serial femtosecond crystallography experiment where a first  
211 pulse, attenuated using a sapphire wafer mounted on a fast flipper, was followed by a second,  
212 unattenuated pulse (**Fig. S2**). Using SACLA's repetition rate of 30 Hz, the 10 fs pump and probe  
213 were spaced 33 ms apart. While several different levels of attenuation were explored, data for a  
214 500 kGy pump (94% attenuated) yielded structural changes consistent with photoreduction.  
215 Interestingly, in contrast to the SSX series, **Fig. 3C**, this experiment preserves the iron  
216 coordinating water that was clearly resolved in electron density, **Fig. 4**, consistent with penta-  
217 coordinated ferrous iron. Ensuing refinement confirms presence of the alternative conformation of  
218 Arg203 (**Fig. S3**). For the high occupancy state of Arg203 with the guanidino group closest to the  
219 iron centre, distances were 4.8 Å between the  $\eta_1$  amide of Arg203 and the phenolate oxygen of  
220 Tyr200, and 4.6 Å between the  $\eta_2$  amide of Arg203 and the alkoxy group of Tyr13. The XRPP  
221 experiment thus induced specific alteration(s) and created the FutA ferrous state *in situ*.

## 222 Discussion

223 The adaptation of the marine cyanobacterium *Prochlorococcus marinus* is a remarkable story of  
224 ecological success, making this photosynthetic organism the most abundant on earth. Two  
225 factors are particularly important, the ability to survive under limiting nutrient conditions, and  
226 physical size reduction, and both factors put evolutionary pressure on the iron uptake system of  
227 the bacterium (13, 14). This study addresses the challenge of how a single gene product, FutA,  
228 can bind both ferric and ferrous iron.

229 The structural analyses reported at ambient temperature allow delineating a plausible mechanism  
230 for iron binding in two different oxidation states, showing how FutA Arg203 operates as a switch  
231 between states. The side chain of this residue is not engaged in polar contacts in the ferric states,  
232 which is hinting at its intrinsic dynamics, allowing it to be recruited and engage in interaction with  
233 the iron center and contribute a balancing charge in the ferrous state, **Fig. 3D**.

234 X-ray crystallographic study of RedOx active metallo-proteins is challenging as X-ray induced  
235 photoreduction can occur. Transition metals are particularly sensitive to specific radiation damage  
236 (28, 40). Changes in the oxidation state induced by X-rays were previously documented for doses  
237 as low as 33 kGy (30, 41). For  $\text{Fe}^{3+}$ , we show that the half-point for photoreduction corresponds  
238 to a dose of 56 +/- 10 kGy, as shown by spectroscopic analysis, **Fig. 2B**. Observation of the FutA  
239 ferrous state required SFX / neutron diffraction.

240 We exploited the effects of X-ray induced photoreduction to study the transition between ferric  
241 and ferrous states, using a SSX dose series and an SFX X-ray pump probe setup, both allowing  
242 to map conformational changes at ambient temperatures (42). The major difference observed  
243 between these approaches occurred for density of the coordinating solvent water, which  
244 disappeared with accumulating dose in SSX, **Fig. 3C**, while the SFX XRPP approach preserved  
245 the electron density, **Fig. 4**. This may be attributed to the different time domains probed, or the  
246 increasing non-isomorphousness in the SSX dose series (43, 44).

247 The dose delivered in a 10-femtosecond pulse in the SFX XRPP pump was with 500 kGy about  
248 4.5-5.6 times higher than the doses used in the home source or SSX experiments, respectively.  
249 However, the home source dataset required data collection for 1 hour, while the SSX dose series

250 was collected in 110 ms per crystal, and the SFX XRPP experiment was collected in 33 ms per  
251 crystal. Further to the different timescales, the SFX experiment used pulsed rather than  
252 continuous illumination, and/or could differ in heat load. Beam sizes were also different, with 10  
253 micron for SSX and 1.5 micron for SFX experiments, providing an important difference for photo-  
254 electron escape (45). Further work is needed to understand radiation chemistry arising from these  
255 different conditions.

256 Discovery of a mechanism to bind two different iron oxidation states prompted us to revisit  
257 homologues of the FutA iron binding protein, and we found that a similar switch may exist for the  
258 iron binding protein FbpA from *Thermus thermophilus* with structures in two states reported (**Fig.**  
259 **S4**). *Synechocystis* has two specialized iron binding proteins (22, 26, 46), with FutA2 being  
260 assigned a ferric binding function in the oxidative environment of the periplasm, while FutA1 binds  
261 ferrous iron favored under reducing conditions in the cytosol. For these proteins, conservation of  
262 the arginine residue equivalent *Prochlorococcus* Arg203 (**Fig. S5**) may relate to biological ability  
263 to bind iron at different oxidation states, as discussed in supplementary text.

264 Conclusion: Structures with iron bound in different oxidation states help explain how the intrinsic  
265 structural plasticity of FutA accommodate ferrous as well as ferric iron species. Translated into a  
266 molecular mechanism, an arginine side chain flip provides a charge balance. The acute sensitivity  
267 of FutA to specific radiation damage illustrates the requirement for dose limiting data collection  
268 regimes. We have used photoreduction as an advantage to study the transition of ferric to ferrous  
269 binding state. The X-ray pump probe approach demonstrated here has the potential to become a  
270 straightforward-to-implement approach to induce redox state changes probing structural  
271 transitions. We envisage that more complex experiments could generate photoreduced states  
272 akin to anaerobic conditions that are amenable for further modification by ligand addition.

## 273 **Materials and Methods**

274 *Molecular biology; protein purification; protein crystallization; sample preparation for serial*  
275 *crystallography; crystallographic data processing; structure determination and refinement;*  
276 *processing of UV spectra* are found in Extended Materials and Methods in SI.

277 *Dose calculations.* Diffraction-weighted doses (DWD) as reported in all cases were calculated  
278 with RADDPOSE-3D (47). For SFX XRPP, RADDPOSE-3D rather than RADDPOSE-XFEL was used  
279 as we were probing the effects of the total dose deposited by the pump pulse 33 milliseconds  
280 after the pulse rather than the time resolved evolution of dose within the duration of the pulse.

281 *Home source crystal structure.* RT data were collected from a single crystal grown from batch  
282 crystallization and measuring 0.32 x 0.53 x 0.54 mm<sup>3</sup>, mounted in a 0.7 mm sealed quartz  
283 capillary on a Rigaku 007 HF (High Flux) diffractometer equipped with a HyPix 6000HE detector.  
284 The X-ray beam with a flux of 2.5 x 10<sup>9</sup> ph/s at 8.1 keV was collimated at 200 μm<sup>2</sup>. The total  
285 exposure time of 1 hr equated to a total dose of 110 kGy.

286 *Neutron crystallography.* For hydrogen-deuterium exchange, FutA crystals grown from batch  
287 crystallization were transferred into crystal mother liquor prepared with deuterated water, in two  
288 subsequent exchanges for 24 hrs. Crystals with a volume larger than 0.2 mm<sup>3</sup> were mounted in 1  
289 mm sealed quartz capillaries. Data collection at BIODIFF (48), Forschungsreaktor München II  
290 (Germany) used a monochromatic neutron beam. The final dataset was merged from two  
291 isomorphous crystals collected at wavelengths of 3.1023 and 3.0946 Å.

292 *Serial synchrotron crystallography (SSX).* SSX data were collected at beamline I24, Diamond  
293 Light Source, using silicon chips with 12 μm apertures. At each aperture ten images were  
294 collected to obtain two series with 5 kGy and 22 kGy dose-slicing (10 ms per image). Images  
295 were separated into individual dose points for processing (41). Datasets above a total dose of  
296 110 kGy were no longer isomorphous with the lowest dose point, likely due to global damage, as

297 corroborated by the increase in B-factors, and tying with observation of difference density  
298 features “waning” at higher doses.

299 *Serial femtosecond crystallography (SFX)*. SFX data were collected at SACLA beamline BL2  
300 EH3, Japan, using the MPCCD detector. The XFEL was operated at an X-ray energy of 11.0 keV  
301 with a pulse length of 10 fs and a repetition rate of 30 Hz. Synchronizing chip translation with the  
302 XFEL pulse, data collection took roughly 14 mins per chip.

303 *SFX X-ray pump probe*. For the XRPP experiments, a flipper-attenuator was used to reduce the  
304 flux of alternate XFEL pulses. A fast, self-restoring rotary shutter (Branstrom Instruments, USA)  
305 mounted upstream of the sample and containing Sapphire wafer in a range of thicknesses was  
306 triggered, via TTL from a signal generator, to move the wafer into and out of the X ray beam path.  
307 Pump and probe diffraction images were separated based on total scattering intensity using the  
308 `dxtbx.radial_average` function from the DIALS software package (**Fig. S2**).

309 *Electron paramagnetic resonance*. FutA at a concentration of 50  $\mu\text{M}$  was shock-frozen in liquid  
310 nitrogen. Data collection was carried out in EPR quartz tubes at liquid helium temperature.  
311 Reduction of FutA was carried out by addition of 500  $\mu\text{M}$  sodium dithionite prior to freezing. X-  
312 band continuous wave EPR spectra were recorded on a Bruker `eleXsys E500` spectrometer using  
313 a standard rectangular Bruker EPR cavity (ER4102T) equipped with an Oxford helium cryostat  
314 (ESR900). The spectrometer worked at X-band frequency with a 10 Gauss modulation amplitude  
315 and 2 mW microwave power. All spectra were recorded at 5 – 6 K.

316 *RT in crystallo UV-vis absorption spectroscopy*. X-ray dose dependent UV-vis absorption  
317 spectroscopy was performed at ESRF beamline BM07-FIP2 equipped with an online  
318 microspectrophotometer (38, 49). A 400  $\mu\text{m}$  optical fibre was used to connect a balanced  
319 deuterium-halogen lamp (Mikropack DH2000-BAL, Ocean Optics) to the higher objective, while a  
320 600  $\mu\text{m}$  optical fibre connected the lower objective to a fixed-grating spectrophotometer equipped  
321 with a CCD detector (QE65 Pro, Ocean Optics). The focal volume probed by the  
322 microspectrophotometer of 50 x 50 x  $\sim 100 \mu\text{m}^3$  was fully irradiated by the 200 x 200  $\mu\text{m}^2$  X-ray  
323 top-hat beam (flux between 4.1 and 5.0 x 10<sup>11</sup> ph/s at 12.66 keV). Spectra were acquired at 0.4  
324 Hz (250 ms acquisition time averaged 10 times). Crystals with a volume between 160 x 70 x 50  
325  $\mu\text{m}^3$  and 200 x 90 x 80  $\mu\text{m}^3$  were oriented to optimize the signal-to-noise ratio of the spectra, and  
326 maintained still during X-ray exposure in a loop-mount using a humidity controller (HC-Lab,  
327 Arinax) (50).

## 328 **Acknowledgments**

329 We thank Chris Holes for macromolecular crystallization, Peter Horton for diffraction, and Peter  
330 Roach for critical discussion at the University of Southampton (UoS). We are grateful to SACLA  
331 beamline staff, in particular Shigeki Owada and Kensuke Tono for technical assistance. We  
332 acknowledge financial support: Biological Sciences Research Council (BBSRC) to the XFEL  
333 program under Japan Partnering Award BB/R021015/1 and BB/W001950/1; the Japan  
334 Synchrotron Radiation Research Institute 2018A8005 and 2019A8004; the UK XFEL Hub,  
335 Diamond Light Source (DLS) for travel support; studentship support by the South Coast  
336 Biosciences Doctoral Training Partnership (SoCoBio DTP) to JS, the National Oceanography  
337 Center to MoM, the DLS and UoS to RB, MoM, JS, MR, and Hamburg University to NC. UV-vis  
338 absorption spectroscopy experiments were carried out using the BM07-FIP2 and *icOS* platforms  
339 of the Grenoble Instruct-ERIC Center (ISBG; 404 UAR 3518 CNRS-CEA-UGA-EMBL) within the  
340 Grenoble Partnership for Structural Biology supported by FRISBI (ANR-10-INBS-0005-02) and  
341 the University Grenoble Alpes graduate school supported by CBH-EUR-GS (ANR-17-EURE-  
342 0003), carried out in the RADDAM bag. AMO and JS were supported in part by DLS, the UK  
343 Science and Technology Facilities Council, the BBSRC, the Wellcome Investigator Award  
344 210734/Z/18/Z, and a Royal Society Wolfson Fellowship RSWF\R2\182017 (all to AMO).



## 345 References

- 346 1. K. Hans Wedepohl, The composition of the continental crust. *Geochimica et*  
347 *Cosmochimica Acta* **59**, 1217-1232 (1995).
- 348 2. P. W. Boyd *et al.*, Mesoscale Iron Enrichment Experiments 1993-2005: Synthesis and  
349 Future Directions. *Science* **315**, 612-617 (2007).
- 350 3. M. L. Wells, N. M. Price, K. W. Bruland, Iron chemistry in seawater and its relationship to  
351 phytoplankton: a workshop report. *Marine Chemistry* **48**, 157-182 (1995).
- 352 4. W. Stumm, B. Sulzberger, The cycling of iron in natural environments: Considerations  
353 based on laboratory studies of heterogeneous redox processes. *Geochimica et*  
354 *Cosmochimica Acta* **56**, 3233-3257 (1992).
- 355 5. H. W. Rich, F. M. M. Morel, Availability of well-defined iron colloids to the marine diatom  
356 *Thalassiosira weissflogii*. *Limnology and Oceanography* **35**, 652-662 (1990).
- 357 6. J. A. Raven, M. C. W. Evans, R. E. Korb, The role of trace metals in photosynthetic  
358 electron transport in O<sub>2</sub>-evolving organisms. *Photosynthesis Research* **60**, 111-150  
359 (1999).
- 360 7. S. Richier *et al.*, Abundances of Iron-Binding Photosynthetic and Nitrogen-Fixing Proteins  
361 of *Trichodesmium* Both in Culture and In Situ from the North Atlantic. *PLoS ONE* **7**,  
362 e35571 (2012).
- 363 8. J. T. Snow *et al.*, Quantifying Integrated Proteomic Responses to Iron Stress in the  
364 Globally Important Marine Diazotroph *Trichodesmium*. *PLOS ONE* **10**, e0142626 (2015).
- 365 9. Z. S. Kolber *et al.*, Iron limitation of phytoplankton photosynthesis in the equatorial Pacific  
366 Ocean. *Nature* **371**, 145-149 (1994).
- 367 10. M. C. Moore *et al.*, Large-scale distribution of Atlantic nitrogen fixation controlled by iron  
368 availability. *Nature Geoscience* **2**, 867-871 (2009).
- 369 11. M. A. Huston, S. Wolverton, The global distribution of net primary production: resolving  
370 the paradox. *Ecological Monographs* **79**, 343-377 (2009).
- 371 12. P. Flombaum *et al.*, Present and future global distributions of the marine cyanobacteria  
372 *Prochlorococcus* and *Synechococcus*. *Proceedings of the National Academy of Sciences*  
373 **110**, 9824-9829 (2013).
- 374 13. S. J. Biller, P. M. Berube, D. Lindell, S. W. Chisholm, *Prochlorococcus*: the structure and  
375 function of collective diversity. *Nature Reviews Microbiology* **13**, 13-27 (2015).
- 376 14. F. Partensky, W. R. Hess, D. Vaulot, *Prochlorococcus*, a Marine Photosynthetic  
377 Prokaryote of Global Significance. *Microbiology and Molecular Biology Reviews* **63**, 106-  
378 127 (1999).
- 379 15. P. M. Berube *et al.*, Single cell genomes of *Prochlorococcus*, *Synechococcus*, and  
380 sympatric microbes from diverse marine environments. *Sci Data* **5**, 180154 (2018).
- 381 16. R. Sutak, J.-M. Camadro, E. Lesuisse, Iron Uptake Mechanisms in Marine Phytoplankton.  
382 *Frontiers in Microbiology* **11** (2020).
- 383 17. M. Sandy, A. Butler, Microbial Iron Acquisition: Marine and Terrestrial Siderophores.  
384 *Chem Rev* **109**, 4580-4595 (2009).
- 385 18. D. B. Rusch, A. C. Martiny, C. L. Dupont, A. L. Halpern, J. C. Venter, Characterization of  
386 *Prochlorococcus* clades from iron-depleted oceanic regions. *Proceedings of the National*  
387 *Academy of Sciences* **107**, 16184-16189 (2010).
- 388 19. R. R. Malmstrom *et al.*, Ecology of uncultured *Prochlorococcus* clades revealed through  
389 single-cell genomics and biogeographic analysis. *International Society for Microbial*  
390 *Ecology Journal* **7**, 184-198 (2013).
- 391 20. G. Rocap *et al.*, Genome divergence in two *Prochlorococcus* ecotypes reflects oceanic  
392 niche differentiation. *Nature* **424**, 1042-1047 (2003).
- 393 21. H. Katoh, N. Hagino, A. R. Grossman, T. Ogawa, Genes essential to iron transport in the  
394 cyanobacterium *Synechocystis* sp. strain PCC 6803. *Journal of Bacteriology* **183**, 2779-  
395 2784 (2001).
- 396 22. A. Badarau *et al.*, FutA2 is a ferric binding protein from *Synechocystis* PCC 6803. *Journal*  
397 *of Biological Chemistry* **283**, 12520-12527 (2007).

- 398 23. P. Exss-Sonne, J. Tölle, K. P. Bader, E. K. Pistorius, K.-P. Michel, The IdiA protein of  
399 Synechococcus sp. PCC 7942 functions in protecting the acceptor side of Photosystem II  
400 under oxidative stress. *Photosynthesis Research* **63**, 145-157 (2000).
- 401 24. J. Tölle *et al.*, Localization and function of the IdiA homologue Slr1295 in the  
402 cyanobacterium Synechocystis sp. strain PCC 6803. *Microbiology* **148**, 3293-3305  
403 (2002).
- 404 25. K. P. Michel, E. K. Pistorius, Adaptation of the photosynthetic electron transport chain in  
405 cyanobacteria to iron deficiency: The function of IdiA and IsiA. *Physiologia Plantarum*  
406 **120**, 36-50 (2004).
- 407 26. H. Katoh, N. Hagino, T. Ogawa, Iron-binding activity of FutA1 subunit of an ABC-type iron  
408 transporter in the cyanobacterium Synechocystis sp. Strain PCC 6803. *Plant and Cell*  
409 *Physiology* **42**, 823-827 (2001).
- 410 27. D. Polyviou *et al.*, Structural and functional characterization of IdiA/FutA (Tery\_3377), an  
411 iron-binding protein from the ocean diazotroph Trichodesmium erythraeum. *Journal of*  
412 *Biological Chemistry* **293**, 18099-18109 (2018).
- 413 28. E. F. Garman, M. Weik, Radiation Damage in Macromolecular Crystallography. *Methods*  
414 *Mol Biol* **1607**, 467-489 (2017).
- 415 29. J. A. R. Worrall, M. A. Hough, Serial femtosecond crystallography approaches to  
416 understanding catalysis in iron enzymes. *Curr Opin Struc Biol* **77** (2022).
- 417 30. V. Pfanzagl *et al.*, X-ray-induced photoreduction of heme metal centers rapidly induces  
418 active-site perturbations in a protein-independent manner. *Journal of Biological*  
419 *Chemistry* **295**, 13488-13501 (2020).
- 420 31. S. Horrell *et al.*, Fixed Target Serial Data Collection at Diamond Light Source. *J Vis Exp*  
421 10.3791/62200 (2021).
- 422 32. G. H. Scheepers, J. A. Lycklama A Nijeholt, B. Poolman, An updated structural  
423 classification of substrate-binding proteins. *Federation of European Biochemical*  
424 *Societies Letters* **590**, 4393-4401 (2016).
- 425 33. S. Wang *et al.*, A novel mode of ferric ion coordination by the periplasmic ferric ion-  
426 binding subunit FbpA of an ABC-type iron transporter from *Thermus thermophilus* HB8.  
427 *Acta Crystallographica Section D* **70**, 196-202 (2014).
- 428 34. G. Palmer, The electron paramagnetic resonance of metalloproteins. *Biochem Soc Trans*  
429 **13**, 548-560 (1985).
- 430 35. H. N. Chapman, X-Ray Free-Electron Lasers for the Structure and Dynamics of  
431 Macromolecules. *Annu Rev Biochem* **88**, 35-58 (2019).
- 432 36. K. Nass *et al.*, Structural dynamics in proteins induced by and probed with X-ray free-  
433 electron laser pulses. *Nat Commun* **11**, 1814 (2020).
- 434 37. J. H. Beale *et al.*, Successful sample preparation for serial crystallography experiments.  
435 *Journal of Applied Crystallography* **52**, 1385-1396 (2019).
- 436 38. D. von Stetten *et al.*, In crystallo optical spectroscopy (icOS) as a complementary tool on  
437 the macromolecular crystallography beamlines of the ESRF. *Acta Crystallogr D Biol*  
438 *Crystallogr* **71**, 15-26 (2015).
- 439 39. A. M. Orville, N. Elango, J. D. Lipscomb, D. H. Ohlendorf, Structures of competitive  
440 inhibitor complexes of protocatechuate 3,4-dioxygenase: multiple exogenous ligand  
441 binding orientations within the active site. *Biochemistry* **36**, 10039-10051 (1997).
- 442 40. M. A. Hough, R. L. Owen, Serial synchrotron and XFEL crystallography for studies of  
443 metalloprotein catalysis. *Curr Opin Struct Biol* **71**, 232-238 (2021).
- 444 41. A. Ebrahim *et al.*, Dose-resolved serial synchrotron and XFEL structures of radiation-  
445 sensitive metalloproteins. *International Union of Crystallography Journal* **6**, 543-551  
446 (2019).
- 447 42. J. S. Fraser *et al.*, Accessing protein conformational ensembles using room-temperature  
448 X-ray crystallography. *Proc Natl Acad Sci U S A* **108**, 16247-16252 (2011).
- 449 43. G. Gotthard *et al.*, Specific radiation damage is a lesser concern at room temperature.  
450 *International Union of Crystallography Journal* **6**, 665-680 (2019).

- 451 44. E. De La Mora *et al.*, Radiation damage and dose limits in serial synchrotron  
452 crystallography at cryo- and room temperatures. *Proceedings of the National Academy of*  
453 *Sciences* **117**, 4142-4151 (2020).
- 454 45. S. L. S. Storm *et al.*, Measuring energy-dependent photoelectron escape in microcrystals.  
455 *IUCrJ* **7**, 129-135 (2020).
- 456 46. N. Koropatkin, A. M. Randich, M. Bhattacharyya-Pakrasi, H. B. Pakrasi, T. J. Smith, The  
457 structure of the iron-binding protein, FutA1 from *Synechocystis* 6803. *Journal of*  
458 *Biological Chemistry* **282**, 27468-27477 (2007).
- 459 47. C. S. Bury, J. C. Brooks-Bartlett, S. P. Walsh, E. F. Garman, Estimate your dose:  
460 RADDOSE-3D. *Protein Science* **27**, 217-228 (2018).
- 461 48. T. S. A. Ostermann, BIODIFF: Diffractometer for large unit cells. *Journal of large-scale*  
462 *research facilities* **1**, A2 (2015).
- 463 49. J. McGeehan *et al.*, Colouring cryo-cooled crystals: online microspectrophotometry. *J*  
464 *Synchrotron Radiat* **16**, 163-172 (2009).
- 465 50. J. Sanchez-Weatherby *et al.*, Improving diffraction by humidity control: a novel device  
466 compatible with X-ray beamlines. *Acta Crystallogr D Biol Crystallogr* **65**, 1237-1246  
467 (2009).

468

469 **Figures and Tables**

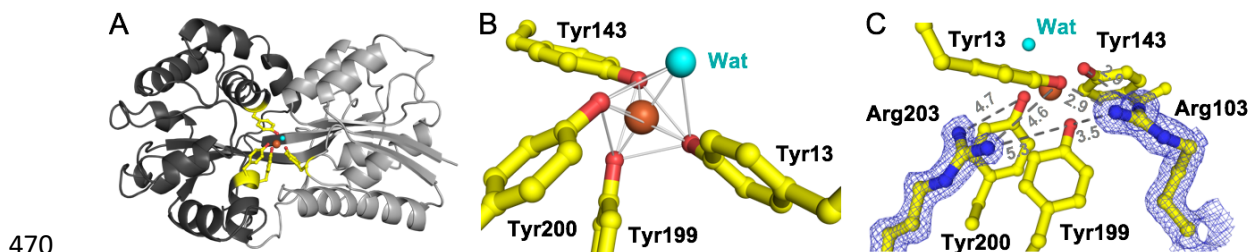

471 **Figure 1.** The FutA structure (ferrous state) from an X-ray home source determined to 1.7 Å  
472 resolution at room temperature. (A) FutA has a bi-lobal structure with the substrate binding cleft  
473 between the N-terminal (light grey) and C-terminal domains (dark grey). Amino acid side chains  
474 contributing to iron binding are shown in stick representation (yellow). (B) Trigonal bipyramidal  
475 coordination of the iron, with Tyr199 and a solvent molecule as axial ligands. (C) The two arginine  
476 side chains of Arg103 and Arg203 are in a second coordination shell, shown here with refined  
477 density (blue map, contoured at 1.5  $\sigma$ ). Color coding is yellow for carbon, red for oxygen, blue for  
478 nitrogen, orange for iron, with the solvent water in light blue.

479 **Figure 2.** FutA (ferric state) characterized by UV/Vis  
480 and EPR spectroscopy, neutron diffraction and serial  
481 femtosecond crystallography. (A) The UV-vis spectrum  
482 of recombinantly produced and purified FutA (blue)  
483 shows an absorbance maximum at 438 nm, consistent  
484 with ferric bound to FutA. The peak at 438 nm  
485 disappears after addition of 10-fold molar excess  
486 sodium dithionite (yellow), where the absorbance  
487 maximum of 315 nm resulted from free sodium  
488 dithionite. (B) EPR spectrum of the FutA iron complex,  
489 and a sodium dithionite reduced sample. The peaks  
490 observed were:  $g_1 = 4.29$  g,  $g_2 = 5.67$  g,  $g_3 = 7.9$  g. (C)  
491 Iron binding site in the neutron diffraction crystal  
492 structure. The positive neutron density (green mesh,  
493  $F_{\text{obs}} - F_{\text{calc}}$  omit map at  $3\sigma$ , 2.1 Å resolution) indicates  
494 sites that have undergone hydrogen-deuterium  
495 exchange and suggesting Arg103 is positively charged.  
496 The four tyrosine side chains do not show difference  
497 density, suggesting they are negatively charged  
498 tyrosinates. (D) The structure determined by SFX  
499 resolves the side chain of Arg203 in the second shell.  
500 However, the side chain of Arg203 is not oriented  
501 towards the binding site and does not engage in polar  
502 interactions (similar to neutron diffraction structure **Fig.**  
503 **S1**). Carbons shown blue (neutron diffraction) or green  
504 (SFX), heteroatoms colored as in **Fig. 1**.

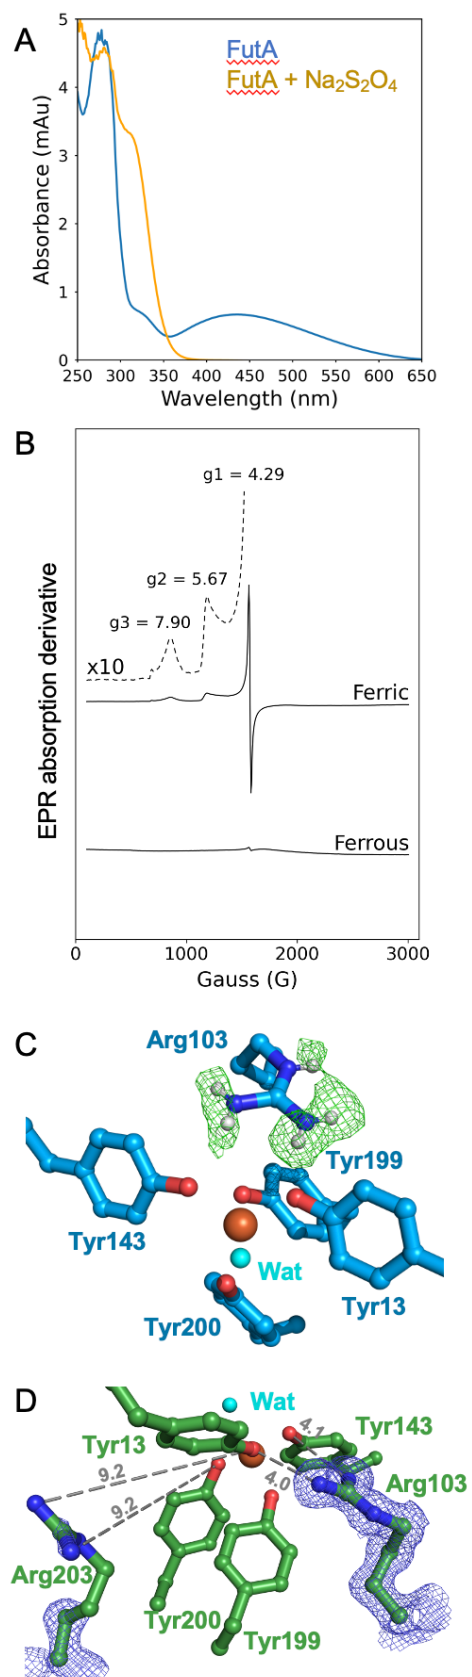

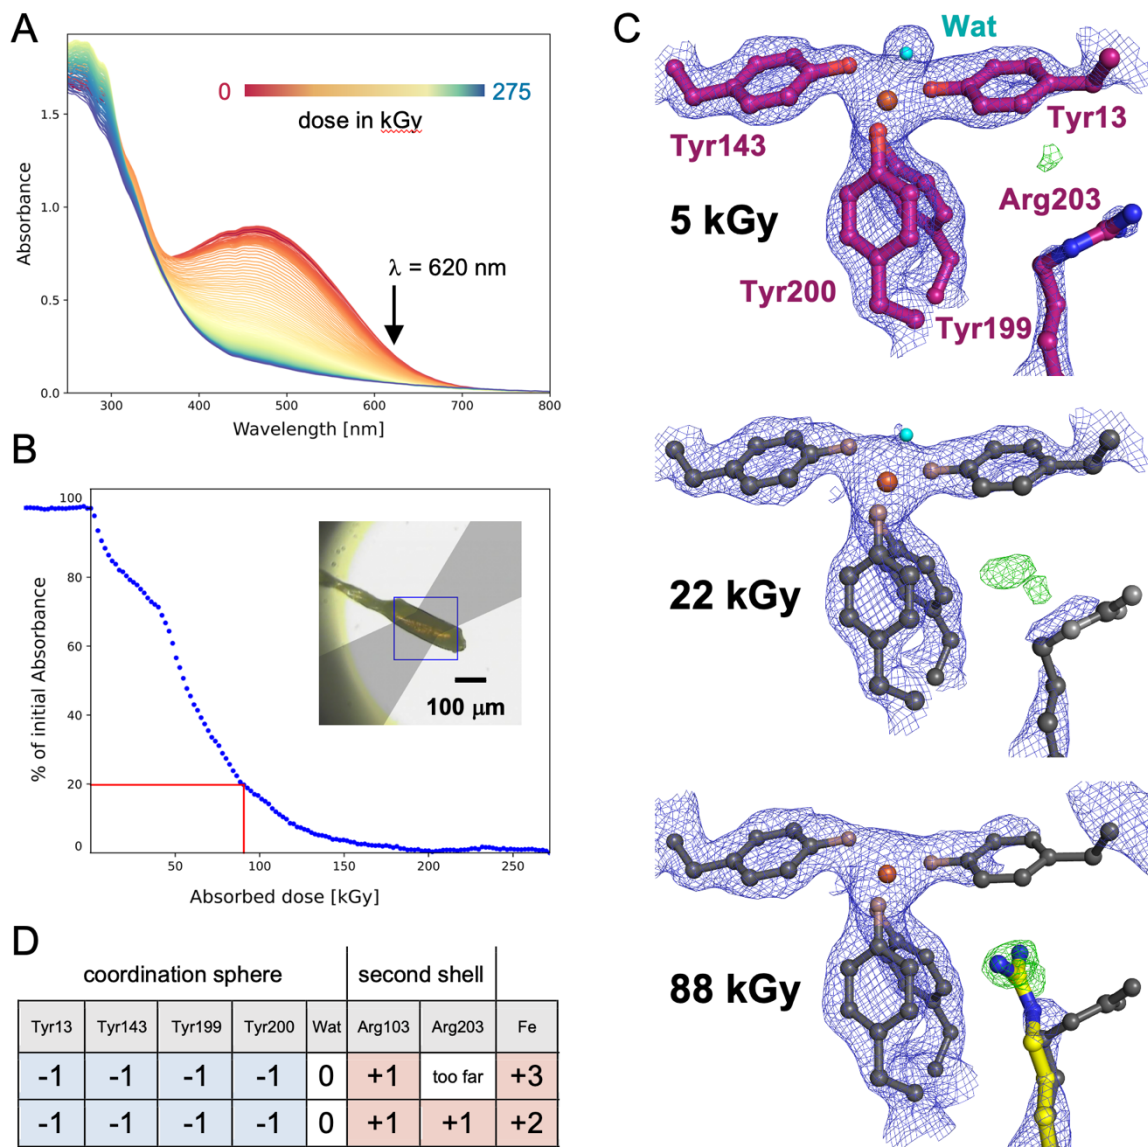

505

506 **Figure 3.** X-ray induced photoreduction of FutA characterized by spectroscopy and SSX at RT.  
 507 (A) Successive UV-Vis absorption spectra collected *in crystallo* plotted for a FutA crystal during  
 508 X-ray exposure, from 0 kGy (red) to 275 kGy (blue). Photoreduction was monitored at a  
 509 wavelength of 620 nm (arrow). (B) Evolution of the normalized absorbance at 620 nm, collected  
 510 on a single crystal. In the example shown, 80% of the signal was lost at 91 kGy (red lines). Inset:  
 511 geometry of the experiment; the X-ray beamsize of 200  $\mu\text{m}^2$  was matched to the crystal (215  $\mu\text{m}$   
 512 in the longest dimension; the light path for spectroscopy is indicated (focal spot 100  $\mu\text{m}$   
 513 in diameter, light path indicated in grey). (C) SSX dose series at RT. Top: refined structure at 5 kGy  
 514 (carbon atoms shown in purple; 2Fo-Fc density in blue contoured at 1.5  $\sigma$ , Fo-Fc in green  
 515 contoured at 3  $\sigma$ ). Pronounced difference density is seen at 22 kGy and 88 kGy, suggesting  
 516 Arg203 takes an alternative conformation, as indicated by overlay with the conformation seen in  
 517 the ferrous state determined from the home source (Arg203 carbons shown in yellow for the 88  
 518 kGy dose point). Heteroatoms colored as in Fig. 1. (D) Charges of amino acids contributing to the  
 519 coordination sphere and second shell for the Fe<sup>3+</sup> ferric and Fe<sup>2+</sup> ferrous binding states, assuming  
 520 an overall neutral state of the binding site.

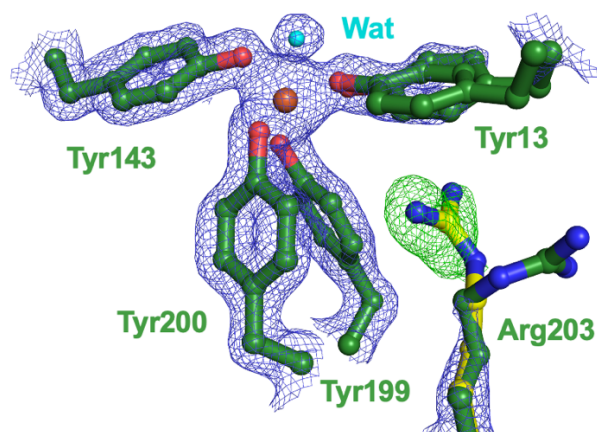

521

522 **Figure 4.** SFX X-ray pump probe experiment. The model of the ferric iron state determined SFX  
523 (compare **Fig. 2D**) was used in refinement against an SFX probe dataset, collected after a 500  
524 kGy pump, in which the side chain of Arg203 was modelled as observed in the ground state  
525 structure. Refined electron density shows Tyr13 in a double conformation and limited density for  
526 the Arg203 guanidino group (2Fo-Fc, blue, 1.5  $\sigma$ ). However, difference density (Fo-Fc, green, 3  
527  $\sigma$ ) suggests that Arg203 takes an alternative conformation, indicated by overlay with the  
528 conformation seen in the ferrous state determined from the home source (Arg203 carbons shown  
529 in yellow). Heteroatoms colored as in **Fig. 1**.

1 **Supplement for**

2 A redox switch allows binding of ferrous and ferric ions in the  
3 cyanobacterial iron binding protein FutA from *Prochlorococcus*

4 **Rachel Bolton *et al.***

5 **This supplement includes:**

6 Extended Materials and Methods

7 Supplementary Text

8 Tables S1 to S4

9 Figures S1 to S5



## 10 Extended Materials and Methods

11 *Molecular biology.* *Prochlorococcus* MED4 *futA* was cloned into pET-24b(+) using the NdeI /  
12 HindIII restriction sites, excluding the region encoding the signal peptide, amino acids 27-340  
13 (UniProt ID: Q7V0T9) as predicted by *SignalP* (1).

14 *Protein purification.* Transformed *Escherichia coli* BL21 (DE3) cells (NEB) were cultured in 3 L  
15 baffled flasks in 1 L lysogeny broth containing 50  $\mu\text{g ml}^{-1}$  kanamycin, and incubated in a shaker  
16 at 130 RPM, 37 °C. The temperature was reduced to 18 °C when the cell culture reached an  
17 OD<sub>600</sub> of 0.4. Protein expression was induced at an OD<sub>600</sub> of ~0.6 by addition of IPTG (final  
18 concentration 1 mM). Cells were harvested after 20 hrs by centrifugation at 4000 x g (Avanti Jxn-  
19 26, JLA-8.1000 rotor). Cell pellets (2-4g) were resuspended in 25 ml IBB buffer (0.1 M Tris  
20 buffered at pH 9, containing 0.5 M NaCl, 1% Triton-X, 5 mM MgCl<sub>2</sub> and 10 mM  $\beta$ -  
21 mercaptoethanol). For lysis 2 mg ml<sup>-1</sup> lysozyme was added, and cells were left for 30 min before  
22 sonication for total pulse time of 150 seconds (Q700 Sonicator, 10 second pulse duration with 20  
23 seconds between pulses). Inclusion bodies were harvested by centrifugation (40 mins, 125 000 x  
24 g, 4 °C, Optima XPN-80, Type 70 Ti rotor). The pellet was washed in IBB containing 2 M urea,  
25 followed by centrifugation (as above). Solubilization was carried out by incubation in 200 mM Tris  
26 buffered at pH 9, containing 6 M urea, 10 mM  $\beta$ -mercaptoethanol (1 hrs, 4 °C). After removing  
27 cellular debris by centrifugation (as above), a rapid dilution protocol was carried out to refold the  
28 protein. The salute was loaded into a syringe with a fine needle and slowly added directly into 2 L  
29 of stirring 0.2 M Tris buffered at pH 9.0, containing 0.2 M NaCl, 0.4 M L-Arginine and 0.1 mM  
30 NH<sub>4</sub>Fe(SO<sub>4</sub>)<sub>2</sub>. After incubation at 4 °C for 48 h, the refolding buffer was concentrated to 150 ml  
31 using an Amicon Stirred Cell (10,000 Da Ultrafiltration Disk, Merck). Dialysis against 2 L 100 mM  
32 Tris buffered at pH 9.0, containing 145 mM NaCl for 24 hrs at 4 °C was followed by capture on a  
33 5 ml HiTrap SP XL column (GE Healthcare) at RT. Step-elution with 0.1 M Tris buffered at pH 9.0,  
34 containing 320 mM NaCl was followed by size-exclusion chromatography on a HiLoad 16/60  
35 Superdex 200 column (GE Healthcare) using 50 mM Tris buffered at pH 9.0, containing 300 mM  
36 NaCl at RT. Fractions containing monomeric FutA were pooled and concentrated using a  
37 Vivaspin 20 Centrifugal Concentrator, MWCO 10,000 Da (Sartorius) at 4 °C.

38 *Protein Crystallization.* FutA at a concentration of ~50 mg ml<sup>-1</sup> was crystallized at RT at the  
39 natural pH from purification (pH 9.0). For vapor diffusion crystallization, 1  $\mu\text{l}$  protein was mixed  
40 with 1  $\mu\text{l}$  0.2 M sodium thiocyanate containing 10 - 35 % (w/v) PEG 3350 and set up in 24-well  
41 XRL plates (Molecular Dimensions). Crystals with 10 – 200  $\mu\text{m}$  in the longest dimension  
42 appeared within 1 day. For batch crystallization, 10  $\mu\text{l}$  of protein was mixed in a microcentrifuge  
43 tube with 10  $\mu\text{l}$  of 0.2 M sodium thiocyanate containing 10 - 24 % (w/v) PEG 3350. Crystals with  
44 200 – 1500  $\mu\text{m}$  in the longest dimension appeared within 3 days. For seeded batch crystallization,  
45 10  $\mu\text{l}$  of FutA crystals obtained from vapor diffusion droplets were mixed with 40  $\mu\text{l}$  20% PEG  
46 3350 and vortexed with Hampton Seed Bead for 180 s. Seed stock aliquots (5  $\mu\text{l}$ ) were shock  
47 frozen and diluted 1:100 with 0.2 M sodium thiocyanate, 20 % (w/v) PEG 3350 prior to use. For  
48 crystallization, 50  $\mu\text{l}$  protein was mixed with 75  $\mu\text{l}$  diluted seed stock and 75  $\mu\text{l}$  of 0.2 M sodium  
49 thiocyanate containing 10 - 20 % (w/v) PEG 3350. Crystals with 10 – 20  $\mu\text{m}$  in the longest  
50 dimension appeared within 30 minutes as described previously (2).

51 *Sample preparation for serial crystallography.* Optimization of crystallization for serial  
52 crystallography was described previously (2). We used a fixed-target silicon chip, each  
53 accommodating 25,600 apertures, to deliver microcrystals to the X-ray interaction region (3). The  
54 crystal slurry (typically 150  $\mu\text{l}$ ) was loaded onto a glow-discharged chip containing 7 or 12  $\mu\text{m}$   
55 sized apertures within a humidity-controlled chamber, collected by applying vacuum, and sealing  
56 the chip between two sheets of 6  $\mu\text{m}$  thick Mylar. Crystal slurries had to be prepared directly  
57 before the experiment to avoid crystal ageing that manifested as loss of diffraction.

58 *Crystallographic data processing, structure determination and refinement.* The home source  
59 diffraction data were integrated with XDS (4), and scaled / merged using POINTLESS and

60 *AIMLESS* (5). The Neutron diffraction data were integrated using *HKL2000* (6) and scaled /  
61 merged using *SCALEPACK* (6). The diffraction data for the SSX dose series was indexed and  
62 integrated using *dials.stills\_process* (*DIALS* v2.0) (7) and scaled using *cctbx.prime* (8). Results  
63 for two dose-series are shown in **Table S2**, using 5 kGy and 22 kGy dose-slicing. B-factor  
64 sharpening was applied in scaling to correct for the increase in B-factors in each series. *SCALEit*  
65 (9) was used to derive the isomorphous difference between two datasets ( $D_{iso}$ ), and scale the  
66 differences in observed structure factors between datasets. SFX diffraction data were stored in a  
67 hdf5 stream, applying indexing and pre-filtering for diffraction hits with *Cheetah* (10). Diffraction  
68 hits were indexed and integrated with *dials.stills\_process* (*DIALS* v3.0) (7). An image mask was  
69 generated manually using *dials.image\_viewer* to remove the beam stop shadow and  
70 monocrystalline Si diffraction spots arising from the chips. Integrated patterns were scaled and  
71 merged using the *DIALS* module *cctbx.xfel.merge* (11). Molecular replacement with *MOLREP*  
72 (12) used the *Synechocystis* PCC 6803 FutA2 as search model (PDB: 2PT1). *COOT* (13), and  
73 *REFMAC5* (14) were used for iterative model building, refinement and validation. Coordinates  
74 and structure factors were deposited with the PDB under accession numbers 8OEM (Home  
75 Source), 8OEN (Neutron), 8C4Y (SFX), 8OGG (SSX 5 kGy), and 8OEI (SFX 500kGy), using the  
76 EBI validation suite.

77 *Processing and plotting of online UV-Vis spectra* was performed in Python with the *NumPy* (15),  
78 *pandas* (16), *SciPy* (17), *statsmodels* (18) and *Matplotlib* (19) packages. Each spectrum was  
79 smoothed using a Savitzky-Golay filter (filter order 3, filter length 25). Baseline correction used  
80 subtraction of the average absorbance calculated between 800 and 880 nm.

## 81 **Supplementary Text**

### 82 **Comparison of neutron diffraction and SFX structures**

83 Further investigation of the iron binding site was carried out by comparing the SFX model and  
84 neutron diffraction model. Refinement of structures obtained by neutron macromolecular  
85 crystallography (NMX) was carried out with the procedures as implemented by us in *REFMAC5*,  
86 available through CCP4 v8.0.

87 We tested two different strategies to refine the iron binding site:

- 88 1. Refinement with “no link” restraints between the OH of the iron coordinating  
89 tyrosinates Tyr13, Tyr143, Tyr 199 and Tyr200, or the proximal solvent water molecule.
- 90 2. Using link restraints between for the above interaction partners, generated as ideal  
91 values for an Fe-O link as derived from the Crystallography Open Database (COD) (20).  
92 Link dictionaries used ideal values of 1.8 Å for the equatorial and 2.004 Å for the axial  
93 ligands, respectively.

94 We compare the “no link” restraint refinement with results from four different sigma values as  
95 applied with the Fe-O link restraints. The observed distances after refinement after refinement for  
96 both SFX and NMX models are reported in **Table S2**. The comparison showed that distances  
97 converged in SFX, while in NMX distances were biased towards restraint target values, as  
98 evident when higher sigma levels were applied. The distance to the axial solvent ligand was  
99 larger in NMX than in SFX structures, leading to a distorted tetrahedron.

### 100 **Analysis of sequence conservation in the iron binding site of FutA proteins**

101 The data in this manuscript suggest that *Prochlorococcus* MED4 FutA can bind iron in the ferric  
102 and in the ferrous redox states, using an arginine switch mechanism. This observation raises the  
103 question whether this concept can be extended to other FutA homologues. We therefore carried  
104 out multiple sequence alignment analysis (MSA) across a set of known FutA homologues, **Fig.**  
105 **S5**.

106 The bacterial species selected here are gram-negative, free-living marine bacteria that are found  
107 in oligotrophic ocean waters. Of these, *Prochlorococcus* MED4 and *Synechocystis* PCC 6803  
108 are capable of carbon fixation, whereas *T. erythraeum* and *C. chwakensis* are also capable of  
109 nitrogen fixation. *T. thermophilus* is a heterotrophic, extremophile, isolated from deep-sea  
110 thermal vents. Species with a single FutA homologue in their genome were *Prochlorococcus*  
111 MED4 (UniProt ID: Q7V0T9), *Trichodesmium erythraeum* (UniProt ID: Q10Z45), *Crocospaera*  
112 *chwakensis* (A3IPT8), and *Thermus thermophilus* (UniProt ID: Q5SHV2). In contrast,  
113 *Synechocystis* PCC 6803 has two FutA homologies, denoted as FutA1 (UniProt ID: P72827) and  
114 FutA2 (UniProt ID: Q55835).

115 The sequences of the FutA homologues were aligned with Clustal Omega (21) and visualized  
116 with JalView (22), as shown in **Fig. S5**. Conservation is shown in blue and indicates the  
117 conservation of the physio-chemical properties of the amino acids across the sequence  
118 alignment (22).

119 For species encoding a single FutA protein the arginine residue equivalent to Arg203 in  
120 *Prochlorococcus* MED4 FutA was conserved. Interestingly, this amino acid is even conserved  
121 *Synechocystis* PCC 6803 which has two FutA homologues, which may suggest that FutA1 and  
122 FutA2 both have capacity to bind ferric or ferrous iron. This observation aligns with gene  
123 knockout studies conducted by us (23) demonstrating a degree of redundancy between the two  
124 FutA homologues.

125 The iron binding site in FpbA from *T. thermophilus* differs from the other proteins, as the residues  
126 equivalent to *Prochlorococcus* MED4 FutA His12 and Tyr13 are exchanged to Glycine and  
127 Glutamine, respectively. Despite this, the residue equivalent to Arg203 is conserved (Arg223). As  
128 FbpA switches from an open (PDB: 3WAE) to a closed conformation (PDB: 4ELR) upon iron  
129 binding, a carbonate ion is lost from the binding site and Arg223 is repositioned away from the  
130 binding site, **Fig. S4** (24, 25). This ability of Arg223 to act as a structural switch and maintain a  
131 net neutral charge in the binding site is therefore highly similar to the observed structural  
132 rearrangement of Arg203 in *Prochlorococcus* MED4 FutA.

133 **Table S1.** Data collection and refinement statistics for FutA structures reported in space group  
134 P2<sub>1</sub>.

135

Data collection statistics

|                                                    | Home Source         | Neutron             | SFX                 | SSX 5 kGy           | SFX 500kGy          |
|----------------------------------------------------|---------------------|---------------------|---------------------|---------------------|---------------------|
| Temperature (°C)                                   | 21                  | 21                  | 25                  | 21                  | 25                  |
| Wavelength                                         | 1.54                | 3.10                | 1.13                | 0.97                | 1.13                |
| # Integrated Lattices                              |                     |                     | 78743               | 5,278               | 24,378              |
| # Merged Lattices                                  |                     |                     | 77936               | 5,170               | 24,141              |
| Unit Cell (a, b, c; Å)                             | 39.4, 78.0,<br>48.0 | 39.5, 78.3,<br>47.9 | 39.1, 78.3,<br>47.4 | 39.7, 78.7,<br>48.4 | 39.4, 78.2,<br>48.0 |
| β angle (°)                                        | 98.2                | 97.4                | 97.4                | 97.8                | 97.9                |
| Resolution (all, Å)                                | 47.50 – 1.70        | 24.95 – 2.1         | 30.10 – 1.60        | 40.97 – 1.76        | 32.42 – 1.65        |
| Resolution (HR, Å)                                 | 1.73 – 1.70         | 2.18 – 2.1          | 1.63 – 1.60         | 1.79 – 1.76         | 1.68 – 1.65         |
| R <sub>split</sub> / R <sub>pim</sub> <sup>1</sup> | 0.009 (0.089)       | 0.098 (0.332)       | 0.053 (0.089)       | 0.235 (0.684)       | 0.134 (0.691)       |
| CC ½ (%) <sup>1</sup>                              | 100.0 (98.6)        | 97.1 (68.1)         | 99.6 (90.6)         | 92.3 (43.1)         | 97.0 (40.0)         |
| I/σI <sup>1</sup>                                  | 71.7 (11.6)         | 4.8 (2.0)           | 12.1 (4.6)          | 3.14 (0.41)         | 3.67 (0.43)         |
| Completeness (%) <sup>1</sup>                      | 97.9 (83.5)         | 81.0 (52.6)         | 99.8 (100.0)        | 100.0 (100.0)       | 100.0 (100.0)       |
| Multiplicity <sup>1</sup>                          | 65.4 (42.1)         | 1.9 (1.1)           | 618.7 (274.5)       | 26.2 (19.1)         | 165.2 (82.4)        |
| Unique Reflections <sup>1</sup>                    | 30,881 (1,369)      | 13,731 (890)        | 37,266<br>(1,877)   | 29,256 (1,467)      | 34,653 (1676)       |
| Wilson B-factor (Å <sup>2</sup> )                  | 14.10               | 10.07               | 12.09               | 24.28               | 20.98               |

Refinement statistics

|                                      | Home Source<br>yellow | Neutron<br>blue | SFX<br>green  | SSX 5 kGy<br>purple | SFX 500 kGy<br>green |
|--------------------------------------|-----------------------|-----------------|---------------|---------------------|----------------------|
| PDB Code                             | 8OEM                  | 8OEN            | 8C4Y          | 8OGG                | 8OEI                 |
| Resolution (Å)                       | 47.50 – 1.70          | 24.95 – 2.1     | 30.10 – 1.60  | 40.97 – 1.76        | 32.42 – 1.65         |
| R <sub>work</sub> /R <sub>free</sub> | 0.153 / 0.180         | 0.182 / 0.250   | 0.190 / 0.208 | 0.202 / 0.241       | 0.162 / 0.189        |
| # Reflections all/free               | 30847 / 1,588         | 13,731 / 698    | 37,266 / 1919 | 29256 / 1503        | 34653 / 1786         |
| Number of Atoms                      |                       |                 |               |                     |                      |
| Protein                              | 2558                  | 4984            | 2485          | 2509                | 2572                 |
| Ion                                  | 1                     | 1               | 1             | 1                   | 1                    |
| Water                                | 117                   | 81              | 86            | 81                  | 105                  |
| Ramachandran                         |                       |                 |               |                     |                      |
| Preferred                            | 305                   | 298             | 304           | 301                 | 302                  |
| Allowed                              | 4                     | 11              | 5             | 8                   | 7                    |
| Outliers                             | 1                     | 1               | 1             | 1                   | 1                    |
| B-factors (Å <sup>2</sup> )          |                       |                 |               |                     |                      |
| Protein                              | 19.71                 | 22.31           | 17.84         | 33.32               | 27.06                |
| Water                                | 25.32                 | 13.41           | 23.32         | 48.19               | 33.05                |
| R.M.S Deviations                     |                       |                 |               |                     |                      |
| Bond Lengths (Å)                     | 0.013                 | 0.005           | 0.013         | 0.006               | 0.009                |
| Bond Angles (°)                      | 1.88                  | 1.14            | 1.76          | 1.41                | 1.54                 |

136 <sup>1</sup>High resolution statistics in parentheses

137 **Table S2.** Comparison of different types of refinement for SFX and NMX structures. Bond lengths  
138 between Fe and the hydroxyl group of the tyrosinates as well as the proximal water. All tabulated  
139 bond lengths are in Å.

| SFX       | no link | Fe-Tyr link (1.8 Å) |               |               |               | Fe-Tyr link (2.004 Å) |               |               |               |
|-----------|---------|---------------------|---------------|---------------|---------------|-----------------------|---------------|---------------|---------------|
| Fe-O      |         | 0.01 $\sigma$       | 0.02 $\sigma$ | 0.03 $\sigma$ | 0.04 $\sigma$ | 0.01 $\sigma$         | 0.02 $\sigma$ | 0.03 $\sigma$ | 0.04 $\sigma$ |
| Fe-Tyr13  | 1.80    | 1.80                | 1.80          | 1.80          | 1.80          | 1.94                  | 1.86          | 1.83          | 1.82          |
| Fe-Tyr143 | 1.97    | 1.87                | 1.93          | 1.95          | 1.96          | 1.99                  | 1.98          | 1.98          | 1.98          |
| Fe-Tyr199 | 1.87    | 1.83                | 1.85          | 1.86          | 1.87          | 1.95                  | 1.91          | 1.89          | 1.89          |
| Fe-Tyr200 | 1.82    | 1.81                | 1.82          | 1.82          | 1.82          | 1.93                  | 1.87          | 1.84          | 1.83          |
| Fe-Water  | 2.17    | 2.16                | 2.16          | 2.16          | 2.16          | 2.16                  | 2.16          | 2.16          | 2.16          |
| NMX       |         |                     |               |               |               |                       |               |               |               |
| Fe-Tyr13  | 2.09    | 1.81                | 1.85          | 1.90          | 1.95          | 2.01                  | 2.02          | 2.04          | 2.05          |
| Fe-Tyr143 | 1.95    | 1.81                | 1.83          | 1.85          | 1.87          | 2.0                   | 2.0           | 1.99          | 1.99          |
| Fe-Tyr199 | 1.83    | 1.80                | 1.80          | 1.80          | 1.81          | 2.0                   | 1.98          | 1.96          | 1.94          |
| Fe-Tyr200 | 1.91    | 1.81                | 1.83          | 1.85          | 1.87          | 2.0                   | 1.99          | 1.98          | 1.97          |
| Fe-Water  | 2.72    | 2.64                | 2.66          | 2.68          | 2.69          | 2.60                  | 2.61          | 2.63          | 2.64          |

140

141 **Table S3.** Full data collection and refinement statistics for two SSX dose series reported in space group P2<sub>1</sub>. Data collection was carried out at RT  
 142 (21 °C) at an energy of X-ray Energy of 12.8 keV for 10 consecutive exposures to give dose points at 5 kGy interval.

143

| Data collection statistics for the 5 kGy SSX dose-series |             | 5 kGy            | 10 kGy           | 15 kGy           | 20 kGy           | 25 kGy           |
|----------------------------------------------------------|-------------|------------------|------------------|------------------|------------------|------------------|
| <b>Data Collection</b>                                   |             |                  |                  |                  |                  |                  |
| Number of Integrated Lattices                            |             | 5278             | 5089             | 5197             | 5158             | 5227             |
| Number of Merged Lattices                                |             | 5170             | 4984             | 4916             | 4946             | 4999             |
| Unit Cell                                                | a, b, c (Å) | 39.7, 78.7, 48.4 | 39.7, 78.7, 48.4 | 39.7, 78.7, 48.4 | 39.7, 78.7, 48.4 | 39.7, 78.7, 48.4 |
|                                                          | $\beta$ (°) | 97.8             | 97.8             | 97.8             | 97.8             | 97.8             |
| Resolution, overall (Å)                                  |             | 40.97 – 1.76     | 40.97 – 1.76     | 40.97 – 1.76     | 40.97 – 1.76     | 40.97 – 1.76     |
| Resolution, high (Å)                                     |             | 1.79 – 1.76      | 1.79 – 1.76      | 1.79 – 1.76      | 1.79 – 1.76      | 1.79 – 1.76      |
| $R_{\text{split}}^1$                                     |             | 23.5 (68.4)      | 25.1 (70.8)      | 20.6 (95.8)      | 24.9 (71.8)      | 24.3 (72.8)      |
| CC 1/2 (%) <sup>1</sup>                                  |             | 92.3 (43.1)      | 91.0 (38.5)      | 91.0 (38.9)      | 89.8 (41.4)      | 90.7 (42.5)      |
| $I/\sigma I$ <sup>1</sup>                                |             | 3.14 (0.41)      | 3.24 (0.41)      | 3.29 (0.42)      | 3.33 (0.41)      | 3.39 (0.40)      |
| Completeness (%) <sup>1</sup>                            |             | 100.0 (100.0)    | 100.0 (100.0)    | 100.0 (100.0)    | 100.0 (100.0)    | 100.0 (100.0)    |
| Multiplicity <sup>1</sup>                                |             | 26.2 (19.1)      | 25.8 (18.8)      | 25.7 (18.8)      | 25.5 (18.6)      | 26.1 (19.0)      |
| Unique Reflections <sup>1</sup>                          |             | 29256 (1467)     | 29256 (1469)     | 29257 (1472)     | 29258 (1471)     | 29258 (1476)     |
| Wilson B-factor (Å <sup>2</sup> )                        |             | 24.25            | 24.73            | 24.93            | 25.17            | 25.52            |
| <b>Data Collection</b>                                   |             |                  |                  |                  |                  |                  |
| Number of Integrated Lattices                            |             | 5372             | 5397             | 5410             | 5444             | 5400             |
| Number of Merged Lattices                                |             | 5119             | 5110             | 5115             | 5160             | 5147             |
| Unit Cell                                                | a, b, c (Å) | 39.7, 78.7, 48.4 | 39.7, 78.7, 48.4 | 39.7, 78.7, 48.4 | 39.7, 78.7, 48.4 | 39.7, 78.8, 48.4 |
|                                                          | $\beta$ (°) | 97.8             | 97.8             | 97.8             | 97.8             | 97.7             |
| Resolution, overall (Å)                                  |             | 40.97 – 1.76     | 40.97 – 1.76     | 40.97 – 1.76     | 40.97 – 1.76     | 40.97 – 1.76     |
| Resolution, high (Å)                                     |             | 1.79 – 1.76      | 1.79 – 1.76      | 1.79 – 1.76      | 1.79 – 1.76      | 1.79 – 1.76      |
| $R_{\text{split}}^1$                                     |             | 24.5 (76.4)      | 24.2 (75.4)      | 24.1 (74.9)      | 23.6 (78.3)      | 23.5 (79.1)      |
| CC 1/2 (%) <sup>1</sup>                                  |             | 91.3 (37.2)      | 90.9 (31.1)      | 91.5 (38.7)      | 92.0 (34.9)      | 91.4 (32.8)      |
| $I/\sigma I$ <sup>1</sup>                                |             | 3.24 (0.37)      | 3.26 (0.39)      | 3.31 (0.37)      | 3.24 (0.36)      | 3.18 (0.35)      |
| Completeness (%) <sup>1</sup>                            |             | 100.0 (100.0)    | 100.0 (100.0)    | 100.0 (100.0)    | 100.0 (100.0)    | 100.0 (100.0)    |
| Multiplicity <sup>1</sup>                                |             | 26.6 (19.4)      | 26.9 (19.6)      | 26.5 (19.4)      | 26.8 (19.7)      | 26.8 (19.6)      |
| Unique Reflections <sup>1</sup>                          |             | 29263 (1475)     | 29265 (1471)     | 29266 (1476)     | 29270 (1476)     | 29273 (1479)     |
| Wilson B-factor (Å <sup>2</sup> )                        |             | 26.00            | 26.21            | 26.67            | 27.12            | 27.52            |

144 <sup>1</sup>High resolution statistics in parentheses

145 **Table S4.** Full data collection and refinement statistics for two SSX dose series reported in space group P2<sub>1</sub> (next pages). Data collection was  
 146 carried out at RT (21 °C) at an energy of X-ray Energy of 12.8 keV for 10 consecutive exposures to give dose points at 22 kGy interval.

147

Data collection statistics for the 22 kGy SSX dose-series

|                                   | 22 kGy           | 44 kGy           | 66 kGy           | 88 kGy           | 110 kGy          |
|-----------------------------------|------------------|------------------|------------------|------------------|------------------|
| <b>Data Collection</b>            |                  |                  |                  |                  |                  |
| Number of Integrated Lattices     | 9015             | 9760             | 10114            | 9914             | 9533             |
| Number of Merged Lattices         | 8989             | 9723             | 10079            | 9878             | 9506             |
| Unit Cell<br>a, b, c (Å)          | 39.5, 78.2, 48.1 | 39.4, 78.2, 48.1 | 39.4, 78.3, 48.0 | 39.4, 78.3, 48.0 | 39.4, 78.3, 48.0 |
| β (°)                             | 97.8             | 97.8             | 97.7             | 97.7             | 97.7             |
| Resolution, overall (Å)           | 40.71 – 2.10     | 40.71 – 2.10     | 40.71 – 2.10     | 40.71 – 2.10     | 40.72 – 2.10     |
| Resolution, high (Å)              | 2.14 – 2.10      | 2.14 – 2.10      | 2.14 – 2.10      | 2.14 – 2.10      | 2.14 – 2.10      |
| R <sub>split</sub> <sup>1</sup>   | 20.5 (24.7)      | 18.5 (20.2)      | 16.9 (19.9)      | 16.3 (20.9)      | 16.6 (24.9)      |
| CC 1/2 (%) <sup>1</sup>           | 91.9 (83.8)      | 93.1 (89.2)      | 94.4 (89.5)      | 94.8 (90.4)      | 94.8 (87.2)      |
| I/σ <sub>1</sub> <sup>1</sup>     | 9.47 (3.04)      | 9.70 (2.88)      | 9.14 (2.35)      | 8.28 (1.87)      | 7.34 (1.46)      |
| Completeness (%) <sup>1</sup>     | 100.0 (100.0)    | 100.0 (100.0)    | 100.0 (100.0)    | 100.0 (100.0)    | 100.0 (100.0)    |
| Multiplicity <sup>1</sup>         | 43.2 (29.7)      | 51.2 (35.5)      | 57.8 (39.9)      | 58.8 (39.0)      | 56.5 (35.0)      |
| Unique Reflections <sup>1</sup>   | 16961 (855)      | 16959 (863)      | 16966 (866)      | 16966 (865)      | 16971 (861)      |
| Wilson B-factor (Å <sup>2</sup> ) | 18.52            | 20.31            | 22.63            | 24.80            | 26.59            |

|                                   | 132 kGy          | 154 kGy          | 186 kGy          | 208 kGy          | 220 kGy          |
|-----------------------------------|------------------|------------------|------------------|------------------|------------------|
| <b>Data Collection</b>            |                  |                  |                  |                  |                  |
| Number of Integrated Lattices     | 8546             | 7476             | 6825             | 6297             | 5738             |
| Number of Merged Lattices         | 8512             | 7442             | 6796             | 6255             | 5699             |
| Unit Cell<br>a, b, c (Å)          | 39.4, 78.4, 48.1 | 39.4, 78.4, 48.1 | 39.4, 78.4, 48.1 | 39.4, 78.3, 48.1 | 39.4, 78.3, 48.1 |
| β (°)                             | 97.7             | 97.7             | 97.7             | 97.7             | 97.7             |
| Resolution, overall (Å)           | 40.70 – 2.10     | 40.71 – 2.10     | 40.72 – 2.10     | 40.72 – 2.10     | 40.73 – 2.10     |
| Resolution, high (Å)              | 2.14 – 2.10      | 2.14 – 2.10      | 2.14 – 2.10      | 2.14 – 2.10      | 2.14 – 2.10      |
| R <sub>split</sub> <sup>1</sup>   | 16.8 (28.7)      | 17.7 (39.5)      | 18.4 (51.2)      | 18.5 (61.8)      | 19.6 (76.9)      |
| CC 1/2 (%) <sup>1</sup>           | 95.3 (84.3)      | 94.9 (75.0)      | 94.5 (63.6)      | 95.6 (58.4)      | 95.6 (47.1)      |
| I/σ <sub>1</sub> <sup>1</sup>     | 6.28 (1.15)      | 5.19 (0.92)      | 4.23 (0.77)      | 3.43 (0.70)      | 2.88 (0.63)      |
| Completeness (%) <sup>1</sup>     | 100.0 (100.0)    | 100.0 (100.0)    | 100.0 (100.0)    | 100.0 (100.0)    | 100.0 (100.0)    |
| Multiplicity <sup>1</sup>         | 50.6 (28.0)      | 44.9 (20.8)      | 41.4 (15.5)      | 38.1 (10.9)      | 34.3 (8.2)       |
| Unique Reflections <sup>1</sup>   | 16977 (862)      | 16981 (860)      | 16983 (856)      | 16986 (859)      | 16989 (861)      |
| Wilson B-factor (Å <sup>2</sup> ) | 27.84            | 29.60            | 30.88            | 31.55            | 37.88            |

148 <sup>1</sup>High resolution statistics in parentheses

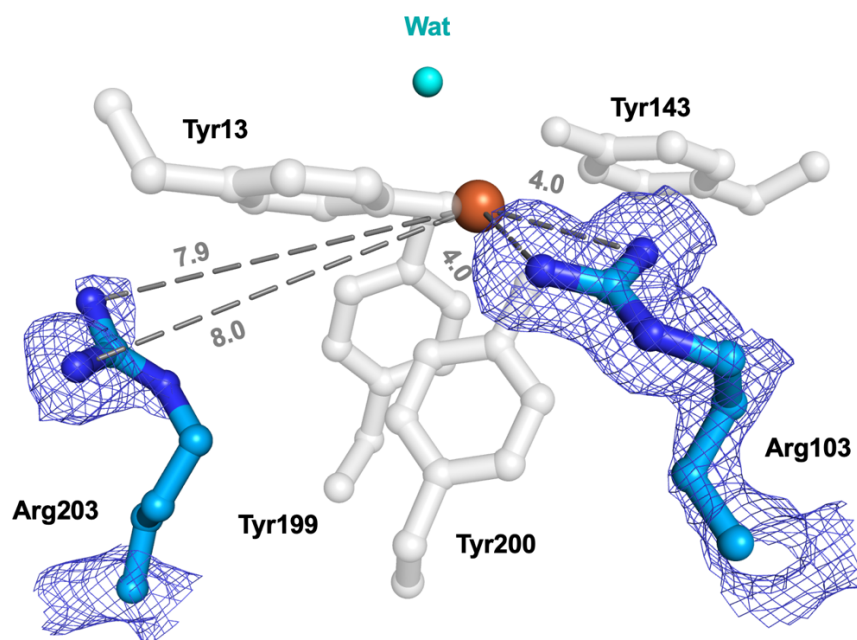

149

150 **Figure S1.** FutA (ferric state) characterized, neutron diffraction structure, compare **Fig. 2C**. The  
 151 electron density ( $2F_{\text{obs}} - F_{\text{calc}}$ , blue, contoured at  $1.5\sigma$ ) reveals positioning of the side chain of  
 152 Arg103 close to the tyrosinates, while the Arg203 side chain does not engage in interactions  
 153 (similar to SFX structure **Fig. 2D**). Carbons shown blue, heteroatoms colored as in **Fig. 1**.

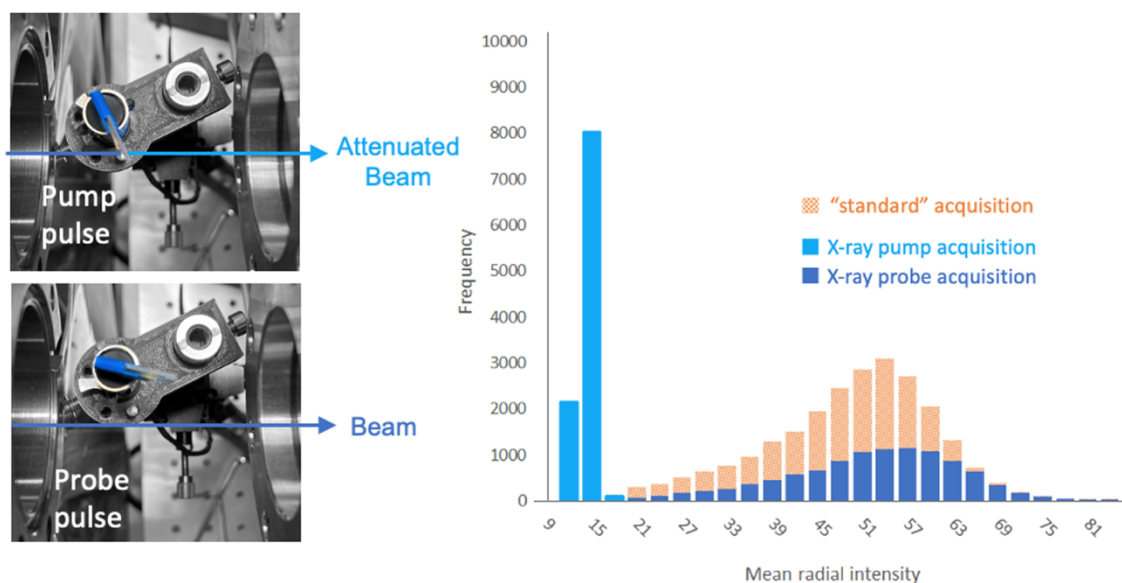

154

155 **Figure S2:** XFEL X-ray pump probe experiment. Left: a sapphire flipper-attenuator was placed in  
 156 the path of the XFEL beam that was TTL triggered from a signal generator to move the wafer with  
 157 alternating pulses, while two diffraction images were collected, corresponding to X-ray *pump* and  
 158 X-ray *probe*. Right: resulting diffraction images are distinguished by mean intensity, where the X-  
 159 ray *pump* shows lower radial intensities (light blue) compared with the X-ray *probe* (dark blue).  
 160 For comparison, a data collecting resulting from a standard SFX experiment is shown (salmon).



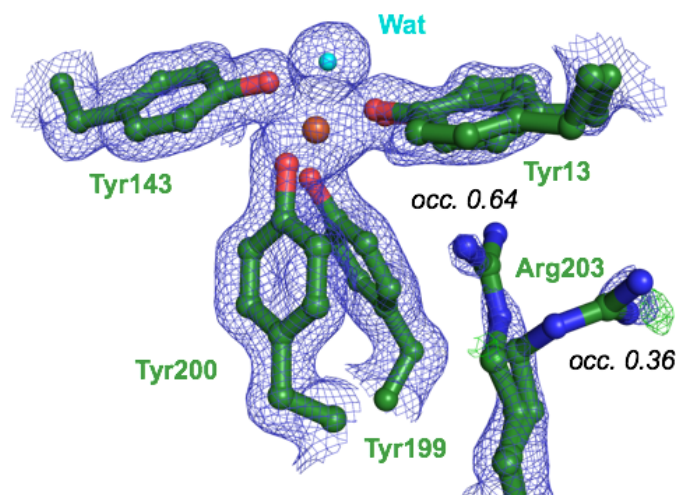

161

162 **Figure S3.** Refined SFX X-ray probe structure, compare **Fig. 4**. The side chain of Arg203 was  
163 refined in dual occupancy, as indicated. Density shown in blue is 2Fo-Fc at 1.5  $\sigma$ , difference  
164 density Fo-Fc, shown in green, 3  $\sigma$ ; no negative difference density was observed. Heteroatoms  
165 colored as in **Fig. 1**.

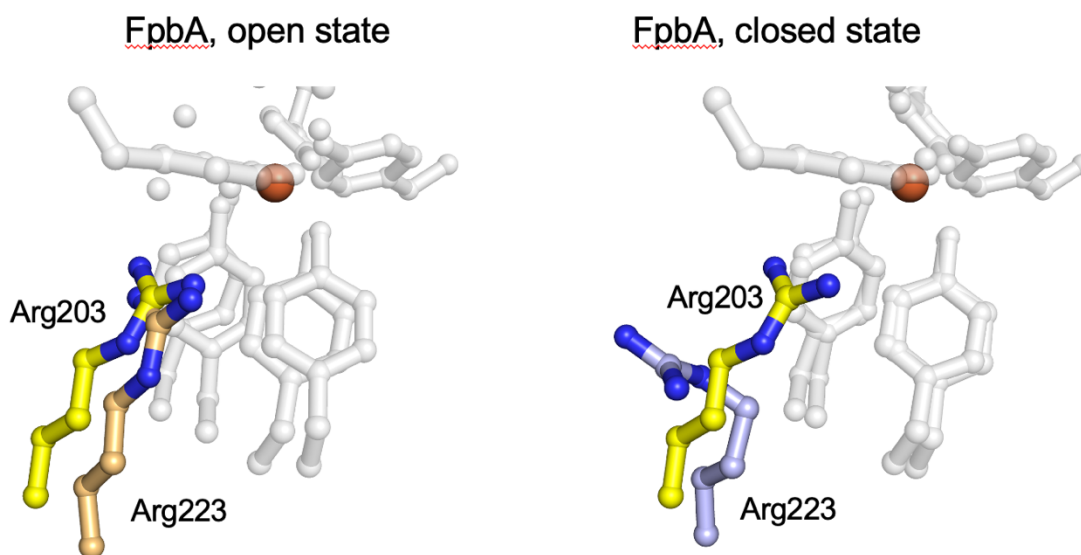

166

167 **Figure S4:** Overlay of ferrous bound *Prochlorococcus* MED4 FutA (yellow) with *Thermus*  
168 *thermophilus* FbpA in the open (light orange, PDB:3WAE) and closed conformations (light purple,  
169 PDB:4ELR). As FbpA switches from an open to a closed conformation, a carbonate ion is lost  
170 and Arg233 is repositioned to maintain a net neutral charge in the binding site. The repositioning  
171 of Arg233 in FbpA is highly similar to the structural switch of Arg203 in FutA. Comparison of RT  
172 rotation data with the SSX structure, dose point at 88 kGy.

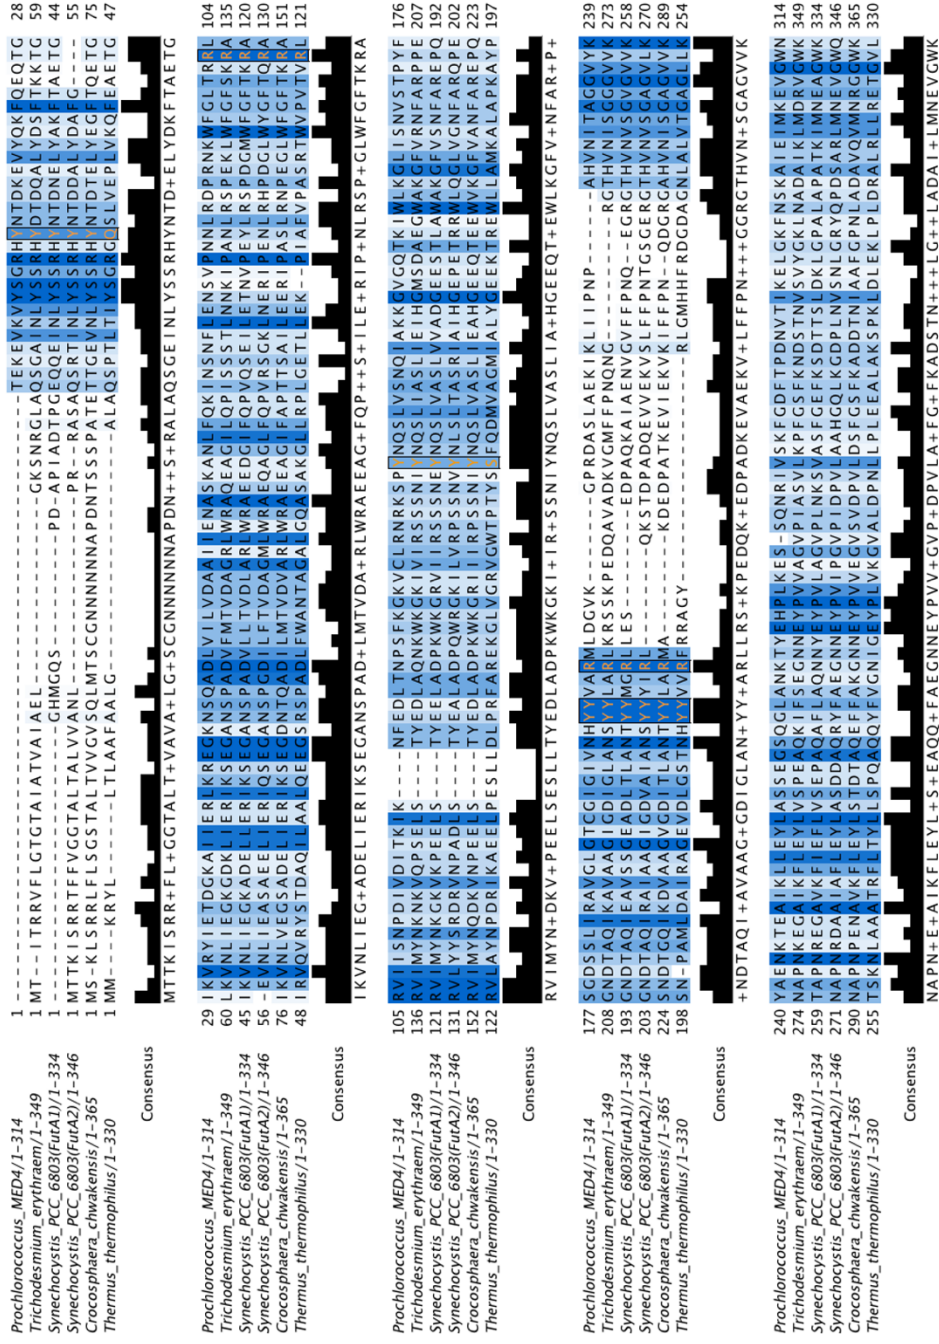

173

174

175

176

177

178

**Figure S5:** Multiple sequence alignment of the FutA homologues from *Prochlorococcus* MED4, *Trichodesmium erythraeum*, *Synechocystis* PCC 6803, *Crocosphaera chwakensis*, and *Thermus thermophilus* carried out with Clustal Omega (21) and Jalview (22). Iron coordinating amino acids in *Prochlorococcus* MED4 are shown in orange text. The consensus graph indicates the modal residue and the number of times the modal residue appears at each position. “+” denotes positions where the modal residue is shared by more than one amino acid type. The blue shading indicates the degree of conservation of the physio-chemical properties of the amino acids at each position.

## 179 References

- 180 1. J. J. Almagro Armenteros *et al.*, SignalP 5.0 improves signal peptide predictions using  
181 deep neural networks. *Nature Biotechnology* **37**, 420-423 (2019).
- 182 2. J. H. Beale *et al.*, Successful sample preparation for serial crystallography experiments.  
183 *Journal of Applied Crystallography* **52**, 1385-1396 (2019).
- 184 3. S. Horrell *et al.*, Fixed Target Serial Data Collection at Diamond Light Source. *J Vis Exp*  
185 10.3791/62200 (2021).
- 186 4. W. Kabsch, XDS. *Acta Crystallographica Section D* **66**, 125-132 (2010).
- 187 5. P. R. Evans, G. N. Murshudov, How good are my data and what is the resolution? *Acta*  
188 *Crystallographica Section D* **69**, 1204-1214 (2013).
- 189 6. Z. Otwinowski, W. Minor, Processing of X-ray diffraction data collected in oscillation  
190 mode. *Methods in Enzymology* **276**, 307-326 (1997).
- 191 7. G. Winter *et al.*, DIALS: implementation and evaluation of a new integration package.  
192 *Acta Crystallographica Section D* **74**, 85-97 (2018).
- 193 8. M. Uervirojnangkoorn *et al.*, Enabling X-ray free electron laser crystallography for  
194 challenging biological systems from a limited number of crystals. *Elife* **4** (2015).
- 195 9. P. Howell, G. Smith, Identification of heavy-atom derivatives by normal probability  
196 methods. *Journal of applied crystallography* **25**, 81-86 (1992).
- 197 10. T. Nakane *et al.*, Data processing pipeline for serial femtosecond crystallography at  
198 SACLA. *Journal of Applied Crystallography* **49**, 1035-1041 (2016).
- 199 11. J. Hattne *et al.*, Accurate macromolecular structures using minimal measurements from  
200 X-ray free-electron lasers. *Nature Methods* **11**, 545-548 (2014).
- 201 12. A. Vagin, A. Teplyakov, MOLREP: an Automated Program for Molecular Replacement.  
202 *Journal of Applied Crystallography* **30**, 1022-1025 (1997).
- 203 13. P. Emsley, B. Lohkamp, W. G. Scott, K. Cowtan, Features and development of Coot.  
204 *Acta Crystallogr D Biol Crystallogr* **66**, 486-501 (2010).
- 205 14. G. N. Murshudov *et al.*, REFMAC5 for the refinement of macromolecular crystal  
206 structures. *Acta Crystallographica Section D* **67**, 355-367 (2011).
- 207 15. C. R. Harris *et al.*, Array programming with NumPy. *Nature* **585**, 357-362 (2020).
- 208 16. W. McKinney, Data Structures for Statistical Computing in Python. *Proceedings of the 9th*  
209 *Python in Science Conference* **445**, 56-61 (2010).
- 210 17. P. Virtanen *et al.*, SciPy 1.0: fundamental algorithms for scientific computing in Python.  
211 *Nature Methods* **17**, 261-272 (2020).
- 212 18. S. Seabold, J. Perktold, Statsmodels: Econometric and Statistical Modeling with Python.  
213 *Proceedings of the 9th Python in Science Conference* **445**, 92-96 (2010).
- 214 19. J. D. Hunter, Matplotlib: A 2D Graphics Environment. *Computing in Science &*  
215 *Engineering* **9**, 90-95 (2007).
- 216 20. S. Grazulis *et al.*, Crystallography Open Database (COD): an open-access collection of  
217 crystal structures and platform for world-wide collaboration. *Nucleic Acids Res.* **40**, D420-  
218 427 (2012).
- 219 21. F. Sievers *et al.*, Fast, scalable generation of high-quality protein multiple sequence  
220 alignments using Clustal Omega. *Molecular Systems Biology* **7**, 539 (2011).
- 221 22. A. M. Waterhouse, J. B. Procter, D. M. A. Martin, M. Clamp, G. J. Barton, Jalview Version  
222 2—a multiple sequence alignment editor and analysis workbench. *Bioinformatics* **25**,  
223 1189-1191 (2009).
- 224 23. D. Polyviou *et al.*, Structural and functional characterization of IdiA/FutA (Tery\_3377), an  
225 iron-binding protein from the ocean diazotroph *Trichodesmium erythraeum*. *Journal of*  
226 *Biological Chemistry* **293**, 18099-18109 (2018).
- 227 24. P. Lu *et al.*, Functional characterisation of two ferric-ion coordination modes of TtFbpA,  
228 the periplasmic subunit of an ABC-type iron transporter from *Thermus thermophilus* HB8.  
229 *Metallomics* **11**, 2078-2088 (2019).
- 230 25. S. Wang *et al.*, A novel mode of ferric ion coordination by the periplasmic ferric ion-  
231 binding subunit FbpA of an ABC-type iron transporter from *Thermus thermophilus* HB8.  
232 *Acta Crystallographica Section D* **70**, 196-202 (2014).
